# Supplementary material for: Extensor carpi ulnaris muscle shows unexpected slow-to-fast fiber-type switch in Duchenne muscular dystrophy dogs
Source: PubMed Central journal article supplement (PMC8688408; doi:10.1242/dmm.049006), 2021-12-16
Supplement: dmm-14-049006-s1.pdf [file dmm-14-049006-s1.pdf]

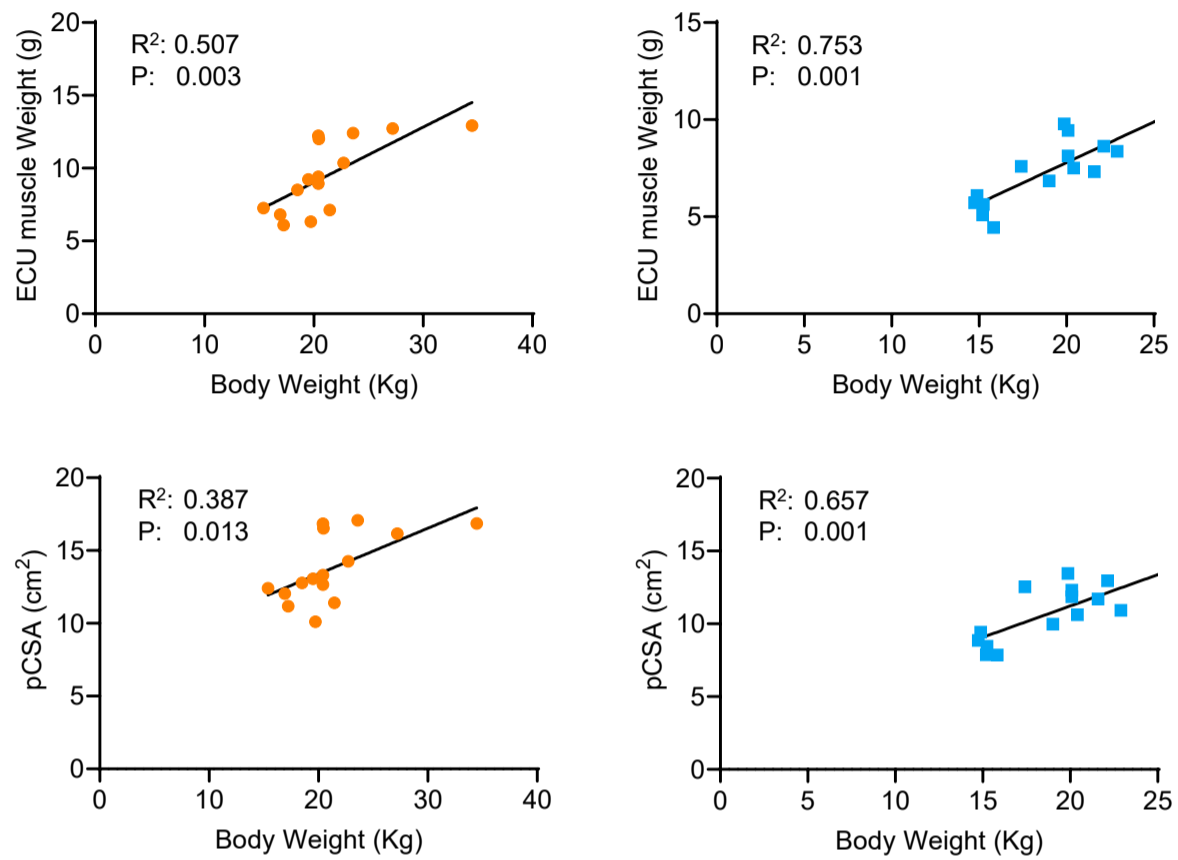

**Fig. S1. Correlation between the body weight and the muscle weight, and between the body weight and the physiological cross-sectional area (pCSA) of the extensor carpi ulnaris (ECU) muscle in normal (n=15) and affected (n=15) dogs.**

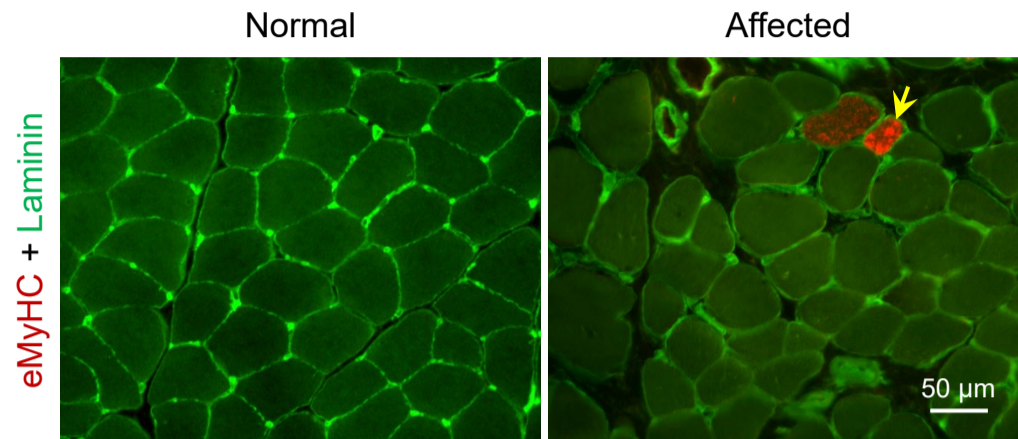

**Fig. S2. Affected dog extensor carp ulnaris muscle shows low-level fresh regeneration.** Representative embryonic myosin heavy chain (eMyHC) immunofluorescence staining images from normal and affected ECU muscles. Individual myofibers were outlined by laminin immunostaining. Yellow arrow, a myofiber containing eMyHC.

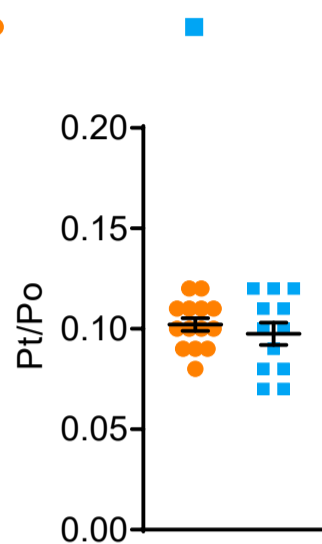

**Fig. S3.** The twitch (Pt) to tetanic (Po) force ratio in normal (n=14) and affected (n=12) dogs.

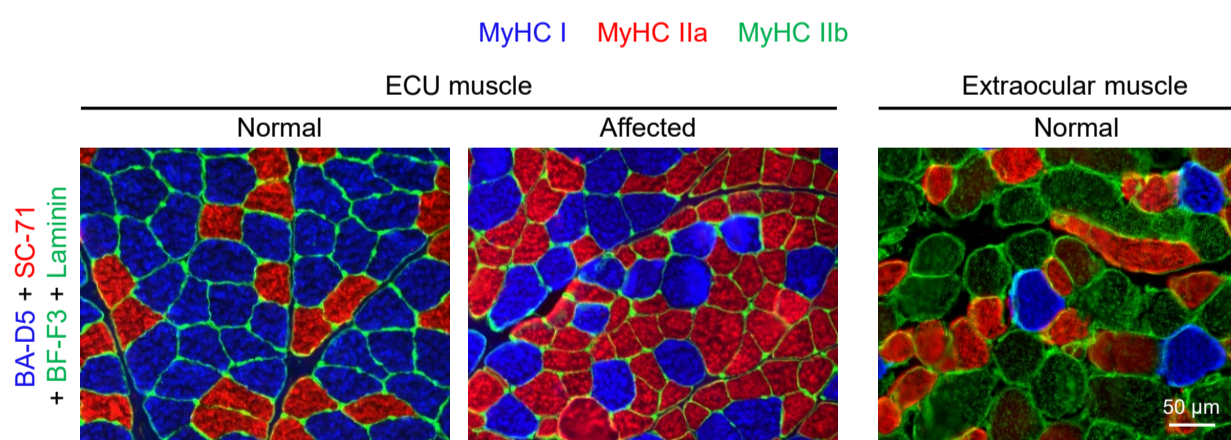

**Fig. S4. Type IIb myofiber is absent in the dog ECU muscle.** Representative myosin heavy chain isoform (MyHC) immunostaining photomicrographs from normal and affected ECU muscles, and a normal extraocular muscle. Type I myofibers (blue) were stained with antibody BA-D5. Type IIa myofibers (red) were stained with antibody SC-71. Type IIb myofibers (green) were stained with antibody BF-F3. The muscle cell membrane (green) was stained with a polyclonal antibody against laminin.

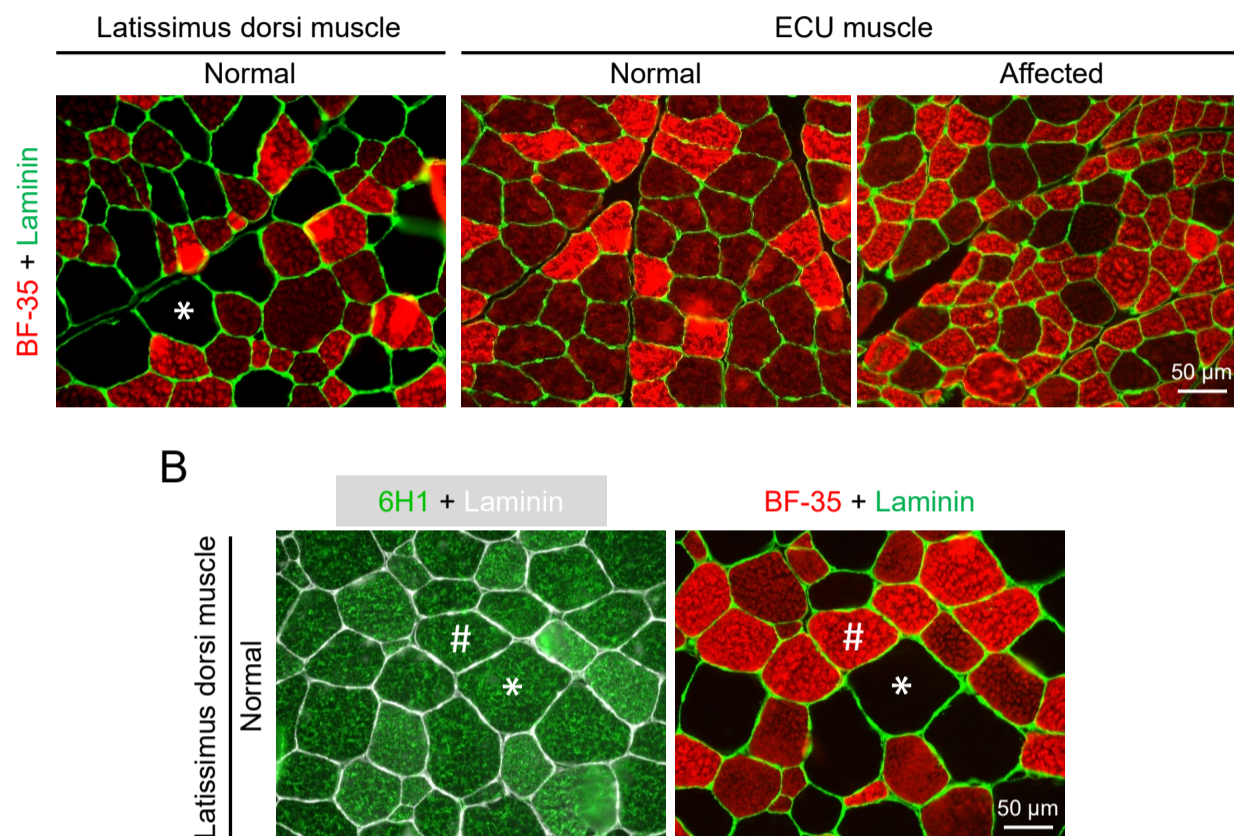

**Fig. S5. Evaluation of type IIx fibers in dog muscle.** (A) Representative myosin heavy chain isoform immunostaining using antibody BF-35. The BF-35 antibody stains all myosin heavy chain isoforms except type IIx. Type IIx fibers can be readily identified in the latissimus dorsi muscle. No type IIx fiber was detected in the dog ECU muscle. Asterisk (\*), a type IIx myofiber. (B) Representative myosin heavy chain isoform immunostaining of the latissimus dorsi muscle using antibodies 6H1 and BF-35. The 6H1 antibody cannot identify type IIx myofibers in dog muscle. Asterisk (\*), a type IIx myofiber. Pound sign (#), a non-type IIx myofiber.

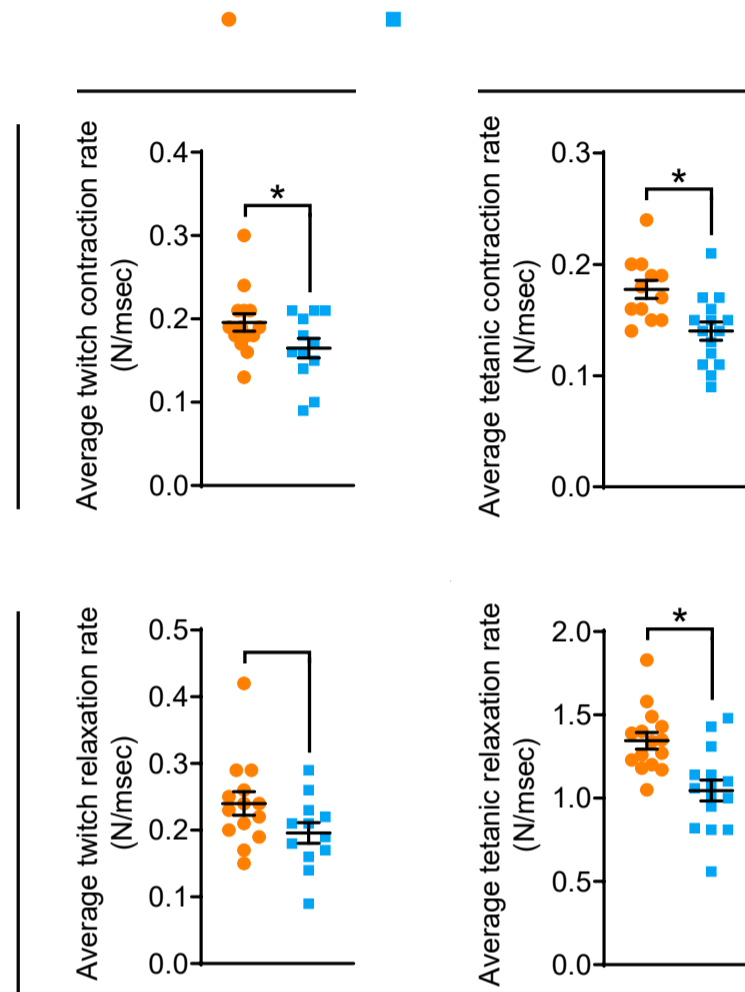

**Fig. S6. Quantification of the average contraction and relaxation rate.** **(A)** The average contraction rate of twitch contraction in the normal (n=14) and affected (n=12) ECU muscle. The rate is calculated using the equation  $P_t/TPT$ . **(B)** The average contraction rate of tetanic contraction in the normal (n=15) and affected (n=15) ECU muscle. The rate is calculated using the equation  $P_o/TPT$ . **(C)** The average relaxation rate (based on  $\frac{1}{2}$  RT) of twitch contraction in the normal (n=14) and affected (n=12) ECU muscle. The rate is calculated using equation  $(P_t) / (\frac{1}{2} RT)$ . **(D)** The average relaxation rate (based on  $\frac{1}{2}$  RT) of tetanic contraction in the normal (n=15) and affected (n=15) ECU muscle. The rate is calculated using equation  $(P_t) / (\frac{1}{2} RT)$ . Asterisk (\*), significantly different from each other.  $P < 0.05$ , unless noted on the graph.

**Table S1. Optimized stimulation parameters of the ECU muscle**

|                                     |                       | <b>Normal</b>      | <b>Affected</b>      |
|-------------------------------------|-----------------------|--------------------|----------------------|
| Sample size                         |                       | 15                 | 15                   |
| Gender                              |                       | M                  | M                    |
| Optimal resting tension (g)         | Min                   | 700                | 300                  |
|                                     | Max                   | 2000               | 1600                 |
|                                     | Average               | 1257.53 ± 352.49   | 728.57 ± 329.17*     |
|                                     | Majority <sup>a</sup> | 1000 to 2000 (80%) | 600 to 1600 (73%)    |
| Optimal stimulation current (mA)    | Min                   | 20                 | 20                   |
|                                     | Max                   | 600                | 300                  |
|                                     | Average               | 100.67 ± 144.54    | 77.33 ± 77.04        |
|                                     | Majority <sup>a</sup> | 40 to 80 (73%)     | 20 to 80 (80%)       |
| Optimal stimulation duration (msec) | Min                   | 500                | 500                  |
|                                     | Max                   | 800                | 800                  |
|                                     | Average               | 760.00 ± 105.56    | 706.67 ± 122.28      |
|                                     | Majority <sup>a</sup> | 800 (87%)          | 800 (60%), 600 (27%) |
| Optimal stimulation frequency (Hz)  | Min                   | 80                 | 80                   |
|                                     | Max                   | 120                | 120                  |
|                                     | Average               | 101.33 ± 14.07     | 94.67 ± 14.07        |
|                                     | Majority <sup>a</sup> | 100 (53%)          | 100 (47%), 80 (40%)  |

ECU, extensor carpi ulnaris muscle; Min, minimum value; Max, maximum value.

\*, Significantly different from normal dogs.

a, Optimal condition(s) in most of the dogs in the same column.

Data are presented as mean ± SD

**Table S2. Antibodies used in myofiber type immunofluorescence staining**

| Antibody name | Isotype | MyHC isoform specificity | Dilution | Figure      |
|---------------|---------|--------------------------|----------|-------------|
| BA-D5         | IgG2b   | MyHC I                   | 1:20     | Figs 7, S4  |
| SC-71         | IgG1    | MyHC IIa                 | 1:100    | Figs 7, S4  |
| BF-F3         | IgM     | MyHC IIb                 | 1:40     | Figs 7, S4  |
| 6H1           | IgM     | MyHC IIx                 | 1:50     | Fig. S5B    |
| BF-35         | IgG1    | All isoforms except IIx  | 1:50     | Fig. S5     |
| F1.652        | IgG1    | eMyHC                    | 1:250    | Figs 3D, S2 |

**Table S3. Primers and probes used in droplet digital PCR**

| Gene | NCBI reference sequence # | MyHC isoform | Forward primer (5' - 3') | Reverse primer (5' - 3')  | Probe (5' - 3')       |
|------|---------------------------|--------------|--------------------------|---------------------------|-----------------------|
| MYH7 | NM_001113711.1            | I            | AGAATGACCTCCAGCTCAAGTG   | AGCGCTCCTCTGCATCAG        | AAGCGGAACAAGACAAC     |
| MYH2 | NM_001076795.1            | IIa          | TCAGTGIGGCTAGCATTGATGATC | GTGAGCTTGTAGATGGAGACTTCT  | ACAGATAGTGCTATTGATATT |
| MYH1 | NM_001113717.1            | IIx          | ACATTGCCGGCTTTGAGATCTT   | GTTTCTCATTGGTGAAGTTGATGCA | CAGGCTGTTAAAATCA      |
| MYH4 | NM_001076794.1            | IIb          | CTGATGAGGGTGAATTCAAGAAGA | CGGACATTGTACTGGATGCAGAAAA | ATGGAGAGGAGAGAGTCC    |

**Table S4. Comparison of the current study and our previous study**

|                                       |         | Current study (Hakim <i>et al.</i> ) |                | Our previous study (Yang <i>et al.</i> ) |                |
|---------------------------------------|---------|--------------------------------------|----------------|------------------------------------------|----------------|
|                                       |         | Normal                               | Affected       | Normal                                   | Affected       |
| Sample size                           |         | 15                                   | 15             | 7                                        | 7              |
| Sex                                   |         | M                                    | M              | M                                        | M & F          |
| Age (year)                            | Min     | 2.16                                 | 2.78           | 0.74                                     | 0.84           |
|                                       | Max     | 3.54                                 | 3.65           | 2.55                                     | 2.52           |
|                                       | Average | 2.96 ± 0.43                          | 3.13 ± 0.41    | 1.64 ± 0.79                              | 1.61 ± 0.78    |
| Body Weight (Kg)                      | Min     | 15.38                                | 14.74          | 13.00                                    | 10.90          |
|                                       | Max     | 34.47                                | 29.84          | 32.20                                    | 22.30          |
|                                       | Average | 21.23 ± 4.65                         | 19.28 ± 4.05   | 20.34 ± 7.29                             | 16.57 ± 4.10   |
| ECU muscle weight (g)                 | Min     | 6.09                                 | 4.44           | 3.60                                     | 2.95           |
|                                       | Max     | 12.93                                | 11.72          | 15.46                                    | 10.51          |
|                                       | Average | 9.49 ± 2.48                          | 7.49 ± 1.95*   | 8.37 ± 4.84                              | 6.08 ± 2.47    |
| ECU weight / Body weight ratio (g/kg) | Min     | 0.32                                 | 0.28           | 0.25                                     | 0.27           |
|                                       | Max     | 0.60                                 | 0.49           | 0.54                                     | 0.51           |
|                                       | Average | 0.45 ± 0.08                          | 0.39 ± 0.05*   | 0.39 ± 0.11                              | 0.36 ± 0.09    |
| ECU muscle length (cm)                | Min     | 11.34                                | 11.76          | 9.70                                     | 14.00          |
|                                       | Max     | 16.38                                | 16.38          | 19.50                                    | 19.00          |
|                                       | Average | 14.14 ± 1.54                         | 14.14 ± 1.31   | 14.48 ± 3.71                             | 16.04 ± 2.13   |
| pCSA (cm <sup>2</sup> )               | Min     | 10.10                                | 7.86           | 7.19                                     | 4.39           |
|                                       | Max     | 17.07                                | 14.89          | 19.65                                    | 11.51          |
|                                       | Average | 13.78 ± 2.35                         | 10.91 ± 2.15*  | 11.37 ± 4.51                             | 7.68 ± 2.16    |
| Po (N)                                | Min     | 113.02                               | 56.23          | 52.80                                    | 24.64          |
|                                       | Max     | 193.38                               | 130.71         | 159.70                                   | 81.80          |
|                                       | Average | 147.05 ± 24.11                       | 97.63 ± 21.13* | 97.15 ± 43.38                            | 54.94 ± 18.70* |
| Po / muscle weight (N/g)              | Min     | 12.75                                | 8.86           | 10.33                                    | 7.79           |
|                                       | Max     | 19.86                                | 16.82          | 15.54                                    | 12.08          |
|                                       | Average | 15.95 ± 2.12                         | 13.30 ± 2.41*  | 12.45 ± 2.16                             | 9.21 ± 1.42*   |
| Po / pCSA (N/cm <sup>2</sup> )        | Min     | 9.26                                 | 6.08           | 6.84                                     | 5.62           |
|                                       | Max     | 12.27                                | 11.97          | 9.81                                     | 8.42           |
|                                       | Average | 10.72 ± 0.84                         | 9.04 ± 1.82*   | 8.38 ± 1.08                              | 7.04 ± 0.96*   |

ECU, extensor carpi ulnaris muscle; M, Male; F, Female; N, newton; Po, tetanic force; pCSA, physiological cross-sectional area; Min, minimum value; Max, maximum value.

\*, Significantly different from normal dogs.

Data are presented as mean ± SD

**Table S5. Comparison of the parameters used in eccentric contraction in the current study and our previous study**

|                     |          | Current study (Hakim <i>et al.</i> ) |             | Our previous study (Yang <i>et al.</i> ) |             |
|---------------------|----------|--------------------------------------|-------------|------------------------------------------|-------------|
|                     |          | Normal                               | Affected    | Normal                                   | Affected    |
| % Length stretched  | Min      | 5.00                                 | 5.00        | 4.99                                     | 3.13        |
|                     | Max      | 5.00                                 | 5.00        | 5.00                                     | 5.06        |
|                     | Average  | 5.00 ± 0.00                          | 5.00 ± 0.00 | 5.00 ± 0.00                              | 4.56 ± 0.65 |
| Stretch rate (mm/s) | Min      | 5.67                                 | 5.88        | 6.58                                     | 6.05        |
|                     | Max      | 8.19                                 | 8.19        | 10.19                                    | 10.35       |
|                     | Average  | 7.07 ± 0.77                          | 7.07 ± 0.65 | 7.90 ± 2.00                              | 7.14 ± 1.72 |
|                     | Variance | 0.59                                 | 0.43        | 3.99                                     | 2.98        |

Min, minimum value; Max, maximum value.

Data are presented as mean ± SD



### Dataset 1. Raw data tables

**Fig. 2c**

| % of Centrally nucleated fibers |          |
|---------------------------------|----------|
| Normal                          | Affected |
| 0.32                            | 47.26    |
| 0.00                            | 31.63    |
| 2.81                            | 19.82    |
| 0.86                            | 18.98    |

**Fig. 2D**

| eMyHC (% Area) |          |
|----------------|----------|
| Normal         | Affected |
| 0.40           | 1.78     |
| 0.22           | 1.38     |
| 0.18           | 2.38     |
| 0.25           | 1.22     |
| 0.26           | 0.92     |
| 0.13           | 2.56     |
| 0.05           | 1.31     |
| 0.21           | 1.83     |
| 0.19           |          |

**Fig. 2E**

| Mini-Feret diameter (µm) | % of myofibers |    |    |    |    |    |    |          |    |    |    |    |    |   |
|--------------------------|----------------|----|----|----|----|----|----|----------|----|----|----|----|----|---|
|                          | Normal         |    |    |    |    |    |    | Affected |    |    |    |    |    |   |
|                          | 0              | 0  | 0  | 0  | 0  | 0  | 0  | 5        | 1  | 2  | 1  | 2  | 5  | 2 |
| 20                       | 0              | 0  | 0  | 0  | 0  | 0  | 5  | 1        | 2  | 1  | 2  | 5  | 2  |   |
| 30                       | 0              | 7  | 1  | 12 | 2  | 2  | 14 | 15       | 16 | 10 | 14 | 37 | 15 |   |
| 40                       | 16             | 38 | 13 | 55 | 28 | 31 | 17 | 34       | 28 | 34 | 35 | 33 | 32 |   |
| 50                       | 50             | 34 | 41 | 29 | 48 | 50 | 17 | 31       | 31 | 27 | 29 | 16 | 30 |   |
| 60                       | 28             | 16 | 33 | 4  | 20 | 15 | 20 | 10       | 15 | 17 | 14 | 6  | 14 |   |
| 70                       | 5              | 5  | 11 | 0  | 2  | 2  | 11 | 6        | 5  | 7  | 4  | 2  | 4  |   |
| 80                       | 0              | 0  | 1  | 0  | 0  | 0  | 10 | 2        | 2  | 3  | 1  | 0  | 2  |   |
| 90                       | 0              | 0  | 0  | 0  | 0  | 0  | 3  | 0        | 0  | 1  | 0  | 1  | 1  |   |
| 100                      | 0              | 0  | 0  | 0  | 0  | 0  | 2  | 0        | 0  | 0  | 0  | 0  | 0  |   |

**Fig. 2D**

| Fibrosis Area (%) |          |
|-------------------|----------|
| Normal            | Affected |
| 7.62              | 18.65    |
| 11.30             | 15.15    |
| 7.25              | 32.30    |
| 12.86             | 31.66    |
| 13.76             | 19.22    |
| 23.07             | 22.33    |
| 11.30             | 18.54    |
| 12.82             | 27.18    |
| 9.78              | 30.34    |
| 11.28             |          |

Average: 1.00 29.42  
 SD: 1.26 13.22  
 Sample size (n): 4 4

Average: 0.21 1.67  
 SD: 0.10 0.57  
 Sample size (n): 9 8

| Mini-Feret diameter | Normal  |       | Normal  |      |
|---------------------|---------|-------|---------|------|
|                     | Average | SD    | Average | SD   |
| 20                  | 0.00    | 0.00  | 2.57    | 1.59 |
| 30                  | 4.00    | 4.20  | 17.29   | 8.24 |
| 40                  | 30.17   | 14.02 | 30.43   | 5.88 |
| 50                  | 42.00   | 8.14  | 25.86   | 6.06 |
| 60                  | 19.33   | 9.37  | 13.71   | 4.23 |
| 70                  | 4.17    | 3.53  | 5.57    | 2.66 |
| 80                  | 0.17    | 0.37  | 2.86    | 3.04 |
| 90                  | 0.00    | 0.00  | 0.86    | 0.99 |
| 100                 | 0.00    | 0.00  | 0.29    | 0.70 |

Sample size (n): 6 7

Average: 12.10 23.93  
 SD: 4.41 6.52  
 Sample size (n): 10 9

**Statistics Analysis**  
 Test: unpaired *t*-test  
 P value: 0.0002

| Fig. 3B |          |
|---------|----------|
| Pt (N)  |          |
| Normal  | Affected |
| 19.47   | 5.65     |
| 12.35   | 12.77    |
| 15.73   | 10.91    |
| 14.24   | 5.53     |
| 13.32   | 9.18     |
| 11.93   | 10.14    |
| 12.76   | 7.31     |
| 16.83   | 13.04    |
| 22.06   | 8.65     |
| 12.57   | 9.13     |
| 13.71   | 9.86     |
| 15.92   | 11.54    |
| 14.85   |          |
| 12.74   |          |

| Fig. 3C                  |          |
|--------------------------|----------|
| sPt (N/cm <sup>2</sup> ) |          |
| Normal                   | Affected |
| 1.49                     | 0.67     |
| 1.11                     | 1.09     |
| 1.23                     | 0.89     |
| 1.07                     | 0.70     |
| 1.05                     | 1.16     |
| 0.96                     | 0.75     |
| 1.06                     | 0.77     |
| 1.18                     | 1.23     |
| 1.29                     | 0.79     |
| 1.10                     | 0.73     |
| 0.81                     | 0.66     |
| 0.96                     | 1.30     |
| 0.92                     |          |
| 1.26                     |          |

| Fig. 3D    |          |
|------------|----------|
| TPT (msec) |          |
| Normal     | Affected |
| 93.70      | 53.87    |
| 76.10      | 62.27    |
| 75.40      | 52.90    |
| 75.27      | 62.43    |
| 76.70      | 65.40    |
| 90.90      | 62.40    |
| 69.93      | 47.07    |
| 70.17      | 60.77    |
| 72.47      | 59.33    |
| 66.17      | 50.97    |
| 71.80      | 57.63    |
| 86.37      | 57.87    |
| 80.87      |          |
| 59.27      |          |

| Fig. 3E      |          |
|--------------|----------|
| 1/2RT (msec) |          |
| Normal       | Affected |
| 66.80        | 41.41    |
| 63.12        | 49.22    |
| 73.99        | 48.14    |
| 60.59        | 64.68    |
| 71.49        | 58.16    |
| 80.91        | 55.27    |
| 54.38        | 34.78    |
| 58.28        | 44.61    |
| 52.38        | 50.70    |
| 52.06        | 44.04    |
| 53.24        | 45.66    |
| 73.59        | 62.26    |
| 90.00        |          |
| 50.61        |          |

| Fig. 3G            |          |
|--------------------|----------|
| Max df/dt (N/msec) |          |
| Normal             | Affected |
| 0.48               | 0.17     |
| 0.34               | 0.36     |
| 0.45               | 0.36     |
| 0.38               | 0.15     |
| 0.35               | 0.23     |
| 0.28               | 0.32     |
| 0.34               | 0.26     |
| 0.45               | 0.38     |
| 0.60               | 0.27     |
| 0.36               | 0.31     |
| 0.35               | 0.30     |
| 0.38               | 0.36     |
| 0.36               |          |
| 0.42               |          |

| Fig. 3H             |          |
|---------------------|----------|
| Max -df/dt (N/msec) |          |
| Normal              | Affected |
| -0.21               | -0.09    |
| -0.14               | -0.17    |
| -0.14               | -0.16    |
| -0.16               | -0.06    |
| -0.13               | -0.10    |
| -0.10               | -0.12    |
| -0.16               | -0.14    |
| -0.19               | -0.19    |
| -0.29               | -0.12    |
| -0.16               | -0.14    |
| -0.18               | -0.15    |
| -0.15               | -0.11    |
| -0.11               |          |
| -0.16               |          |

| Fig. 3I                  |          |
|--------------------------|----------|
| Time to max df/dt (msec) |          |
| Normal                   | Affected |
| 22.10                    | 23.97    |
| 19.85                    | 21.10    |
| 20.50                    | 21.73    |
| 20.40                    | 24.40    |
| 21.20                    | 25.60    |
| 23.03                    | 20.80    |
| 21.00                    | 21.10    |
| 21.70                    | 21.37    |
| 20.47                    | 21.50    |
| 20.50                    | 19.97    |
| 22.53                    | 21.30    |
| 21.83                    | 20.73    |
| 22.80                    |          |
| 19.97                    |          |

| Fig. 3J                   |          |
|---------------------------|----------|
| Time to max -df/dt (msec) |          |
| Normal                    | Affected |
| 39.40                     | 21.27    |
| 35.80                     | 25.40    |
| 31.20                     | 22.20    |
| 27.37                     | 25.30    |
| 27.10                     | 24.47    |
| 32.93                     | 27.87    |
| 32.70                     | 22.10    |
| 28.60                     | 24.07    |
| 34.70                     | 23.30    |
| 32.83                     | 25.33    |
| 27.60                     | 21.47    |
| 40.47                     | 26.20    |
| 35.50                     |          |
| 28.97                     |          |

| Figure  | Normal Average | Normal SD | Normal Sample size (n) | Affected Average | Affected SD | Affected Sample size (n) | Statistics Analysis                               |
|---------|----------------|-----------|------------------------|------------------|-------------|--------------------------|---------------------------------------------------|
| Fig. 3B | 14.89          | 2.94      | 14                     | 9.48             | 2.45        | 12                       | Test: unpaired <i>t</i> -test<br>P value: <0.0001 |
| Fig. 3C | 1.11           | 0.17      | 14                     | 0.90             | 0.23        | 12                       | Test: unpaired <i>t</i> -test<br>P value: 0.0146  |
| Fig. 3D | 76.08          | 9.39      | 14                     | 57.74            | 5.50        | 12                       | Test: unpaired <i>t</i> -test<br>P value: <0.0001 |
| Fig. 3E | 64.39          | 12.17     | 14                     | 49.91            | 8.81        | 12                       | Test: unpaired <i>t</i> -test<br>P value: 0.0022  |
| Fig. 3G | 0.40           | 0.08      | 14                     | 0.29             | 0.08        | 12                       | Test: unpaired <i>t</i> -test<br>P value: 0.0019  |
| Fig. 3H | -0.16          | 0.05      | 14                     | -0.13            | 0.04        | 12                       | Test: unpaired <i>t</i> -test<br>P value: 0.0548  |
| Fig. 3I | 21.28          | 1.06      | 14                     | 21.96            | 1.72        | 12                       | Test: unpaired <i>t</i> -test<br>P value: 0.2249  |
| Fig. 3J | 32.51          | 4.34      | 14                     | 24.08            | 2.06        | 12                       | Test: unpaired <i>t</i> -test<br>P value: <0.0001 |

| Fig. 4B |          |
|---------|----------|
| Po (N)  |          |
| Normal  | Affected |
| 175.11  | 77.37    |
| 160.13  | 103.00   |
| 120.93  | 72.02    |
| 132.15  | 125.77   |
| 141.04  | 56.23    |
| 152.91  | 85.63    |
| 128.56  | 121.56   |
| 123.38  | 71.92    |
| 157.80  | 112.45   |
| 193.38  | 130.71   |
| 113.02  | 97.99    |
| 163.49  | 80.62    |
| 152.97  | 124.30   |
| 173.49  | 93.76    |
| 117.35  | 111.13   |

Average: 147.00 97.63  
 SD: 24.12 23.13  
 Sample size (n): 15 15

Statistics Analysis  
 Test: unpaired t-test  
 P value: <0.0001

| Fig. 4C                  |          |
|--------------------------|----------|
| sPo (N/cm <sup>2</sup> ) |          |
| Normal                   | Affected |
| 10.38                    | 9.15     |
| 12.27                    | 8.80     |
| 10.82                    | 6.08     |
| 10.35                    | 10.22    |
| 10.60                    | 7.15     |
| 12.08                    | 10.86    |
| 10.36                    | 9.03     |
| 10.25                    | 7.63     |
| 11.06                    | 10.59    |
| 11.33                    | 11.97    |
| 9.92                     | 7.56     |
| 9.71                     | 6.43     |
| 9.26                     | 8.35     |
| 10.73                    | 10.58    |
| 11.62                    | 11.15    |

Average: 10.72 9.04  
 SD: 0.84 1.82  
 Sample size (n): 15 15

Statistics Analysis  
 Test: unpaired t-test  
 P value: 0.0031

| Fig. 4D    |          |
|------------|----------|
| TPT (msec) |          |
| Normal     | Affected |
| 814.20     | 809.00   |
| 811.30     | 608.90   |
| 812.80     | 493.60   |
| 809.60     | 603.80   |
| 790.90     | 612.40   |
| 996.80     | 513.50   |
| 801.60     | 796.20   |
| 772.10     | 660.00   |
| 808.90     | 786.60   |
| 804.00     | 810.50   |
| 944.80     | 815.50   |
| 815.10     | 762.10   |
|            | 810.60   |
|            | 698.00   |
|            | 798.20   |

Average: 831.80 705.30  
 SD: 66.95 114.60  
 Sample size (n): 12 15

Statistics Analysis  
 Test: unpaired t-test  
 P value: 0.0024

| Fig. 4E      |          |
|--------------|----------|
| 1/2RT (msec) |          |
| Normal       | Affected |
| 117.24       | 95.09    |
| 118.68       | 97.50    |
| 102.57       | 72.35    |
| 103.84       | 84.95    |
| 105.49       | 100.83   |
| 110.36       | 104.17   |
| 122.96       | 106.79   |
| 97.89        | 88.44    |
| 110.65       | 98.35    |
| 105.77       | 91.14    |
| 93.84        | 91.85    |
| 117.15       | 84.52    |
| 124.42       | 95.20    |
| 109.91       | 92.75    |
| 100.22       | 100.89   |

Average: 109.40 93.65  
 SD: 9.20 8.78  
 Sample size (n): 15 15

Statistics Analysis  
 Test: unpaired t-test  
 P value: <0.0001

| Fig. 4G            |          |
|--------------------|----------|
| Max df/dt (N/msec) |          |
| Normal             | Affected |
| 0.72               | 0.40     |
| 0.79               | 0.57     |
| 0.67               | 0.58     |
| 0.65               | 0.70     |
| 0.47               | 0.29     |
| 0.58               | 0.44     |
| 0.57               | 0.60     |
| 0.53               | 0.55     |
| 0.69               | 0.60     |
| 0.90               | 0.58     |
| 0.57               | 0.50     |
| 0.68               | 0.56     |
| 0.67               | 0.55     |
| 0.85               | 0.69     |
| 0.68               | 0.57     |

Average: 0.67 0.55  
 SD: 0.12 0.10  
 Sample size (n): 15 15

Statistics Analysis  
 Test: unpaired t-test  
 P value: 0.0053

| Fig. 4H             |          |
|---------------------|----------|
| Max -df/dt (N/msec) |          |
| Normal              | Affected |
| -2.47               | -1.37    |
| -2.37               | -1.95    |
| -2.00               | -1.74    |
| -2.07               | -2.35    |
| -2.47               | -0.94    |
| -2.44               | -1.37    |
| -1.85               | -2.14    |
| -2.23               | -1.38    |
| -2.59               | -1.94    |
| -3.26               | -2.73    |
| -2.20               | -2.11    |
| -2.41               | -1.72    |
| -1.68               | -2.59    |
| -2.83               | -1.81    |
| -2.04               | -1.96    |

Average: -2.33 -1.87  
 SD: 0.39 0.48  
 Sample size (n): 15 15

Statistics Analysis  
 Test: unpaired t-test  
 P value: 0.0089

| Fig. 4I                  |          |
|--------------------------|----------|
| Time to max df/dt (msec) |          |
| Normal                   | Affected |
| 28.60                    | 54.20    |
| 26.50                    | 39.60    |
| 87.90                    | 28.60    |
| 28.10                    | 36.70    |
| 30.00                    | 54.20    |
| 52.00                    | 53.90    |
| 33.30                    | 27.50    |
| 57.20                    | 32.80    |
| 31.90                    | 48.20    |
| 67.90                    | 59.10    |
| 66.20                    | 61.50    |
| 70.70                    | 30.30    |
| 25.60                    | 60.70    |
|                          | 34.20    |
|                          | 53.80    |

Average: 46.61 45.02  
 SD: 21.30 12.56  
 Sample size (n): 13 15

Statistics Analysis  
 Test: unpaired t-test  
 P value: 0.809

| Fig. 4J                   |          |
|---------------------------|----------|
| Time to max -df/dt (msec) |          |
| Normal                    | Affected |
| 104.30                    | 84.40    |
| 106.50                    | 88.50    |
| 89.80                     | 66.00    |
| 93.10                     | 74.20    |
| 92.40                     | 91.40    |
| 98.30                     | 93.80    |
| 110.00                    | 94.80    |
| 90.10                     | 78.90    |
| 101.90                    | 88.40    |
| 98.40                     | 83.60    |
| 87.10                     | 84.70    |
| 107.50                    | 77.00    |
| 125.40                    | 87.50    |
| 103.70                    | 84.50    |
| 90.00                     | 90.60    |

Average: 99.90 84.55  
 SD: 10.21 7.81  
 Sample size (n): 15 15

Statistics Analysis  
 Test: unpaired t-test  
 P value: <0.0001

**Fig. 5B**  
Average df/dt (N/msec)

| % of contraction force | Normal  |         |         |         |         |         |         |         |         |          |          |          |          |          |          | Affected |         |         |         |         |         |         |         |         |          |          |          |          |          |          |
|------------------------|---------|---------|---------|---------|---------|---------|---------|---------|---------|----------|----------|----------|----------|----------|----------|----------|---------|---------|---------|---------|---------|---------|---------|---------|----------|----------|----------|----------|----------|----------|
|                        | Dog # 1 | Dog # 2 | Dog # 3 | Dog # 4 | Dog # 5 | Dog # 6 | Dog # 7 | Dog # 8 | Dog # 9 | Dog # 10 | Dog # 11 | Dog # 12 | Dog # 13 | Dog # 14 | Dog # 15 | Dog # 1  | Dog # 2 | Dog # 3 | Dog # 4 | Dog # 5 | Dog # 6 | Dog # 7 | Dog # 8 | Dog # 9 | Dog # 10 | Dog # 11 | Dog # 12 | Dog # 13 | Dog # 14 | Dog # 15 |
|                        | 0-10    | 0.50    | 0.56    | 0.40    | 0.48    | 0.37    | 0.44    | 0.41    | 0.39    | 0.48     | 0.65     | 0.39     | 0.46     | 0.44     | 0.49     | 0.48     | 0.24    | 0.36    | 0.35    | 0.45    | 0.17    | 0.25    | 0.43    | 0.33    | 0.39     | 0.19     | 0.27     | 0.35     | 0.18     | 0.41     |
| 10-20                  | 0.70    | 0.67    | 0.52    | 0.57    | 0.45    | 0.55    | 0.50    | 0.53    | 0.68    | 0.87     | 0.56     | 0.64     | 0.63     | 0.74     | 0.60     | 0.40     | 0.56    | 0.57    | 0.69    | 0.28    | 0.43    | 0.57    | 0.55    | 0.60    | 0.29     | 0.45     | 0.54     | 0.27     | 0.68     | 0.28     |
| 20-30                  | 0.68    | 0.58    | 0.47    | 0.54    | 0.47    | 0.52    | 0.48    | 0.50    | 0.63    | 0.86     | 0.52     | 0.65     | 0.66     | 0.83     | 0.50     | 0.39     | 0.52    | 0.54    | 0.65    | 0.28    | 0.42    | 0.56    | 0.53    | 0.58    | 0.28     | 0.48     | 0.43     | 0.27     | 0.66     | 0.27     |
| 30-40                  | 0.57    | 0.50    | 0.42    | 0.46    | 0.44    | 0.42    | 0.37    | 0.47    | 0.52    | 0.75     | 0.41     | 0.58     | 0.60     | 0.75     | 0.47     | 0.35     | 0.43    | 0.50    | 0.59    | 0.24    | 0.38    | 0.49    | 0.49    | 0.50    | 0.25     | 0.43     | 0.35     | 0.24     | 0.59     | 0.24     |
| 40-50                  | 0.69    | 0.42    | 0.57    | 0.56    | 0.35    | 0.42    | 0.45    | 0.36    | 0.47    | 0.66     | 0.37     | 0.47     | 0.53     | 0.61     | 0.44     | 0.28     | 0.37    | 0.44    | 0.55    | 0.20    | 0.35    | 0.43    | 0.40    | 0.43    | 0.22     | 0.38     | 0.33     | 0.20     | 0.48     | 0.20     |
| 50-60                  | 0.53    | 0.34    | 0.29    | 0.34    | 0.30    | 0.34    | 0.31    | 0.27    | 0.38    | 0.52     | 0.34     | 0.39     | 0.38     | 0.51     | 0.37     | 0.24     | 0.31    | 0.38    | 0.42    | 0.16    | 0.29    | 0.39    | 0.31    | 0.34    | 0.19     | 0.34     | 0.24     | 0.18     | 0.39     | 0.17     |
| 60-70                  | 0.39    | 0.27    | 0.23    | 0.31    | 0.25    | 0.29    | 0.28    | 0.23    | 0.29    | 0.37     | 0.27     | 0.30     | 0.28     | 0.40     | 0.23     | 0.19     | 0.24    | 0.28    | 0.31    | 0.12    | 0.22    | 0.30    | 0.26    | 0.25    | 0.15     | 0.26     | 0.19     | 0.14     | 0.29     | 0.13     |
| 70-80                  | 0.30    | 0.19    | 0.17    | 0.23    | 0.19    | 0.22    | 0.21    | 0.18    | 0.23    | 0.28     | 0.17     | 0.23     | 0.20     | 0.28     | 0.19     | 0.14     | 0.19    | 0.21    | 0.20    | 0.09    | 0.16    | 0.23    | 0.19    | 0.19    | 0.11     | 0.20     | 0.15     | 0.11     | 0.19     | 0.10     |
| 80-90                  | 0.21    | 0.13    | 0.11    | 0.17    | 0.13    | 0.15    | 0.16    | 0.12    | 0.15    | 0.18     | 0.12     | 0.15     | 0.13     | 0.19     | 0.13     | 0.09     | 0.13    | 0.14    | 0.15    | 0.06    | 0.11    | 0.14    | 0.12    | 0.13    | 0.07     | 0.13     | 0.10     | 0.07     | 0.13     | 0.06     |
| 90-100                 | 0.11    | 0.05    | 0.03    | 0.08    | 0.04    | 0.04    | 0.08    | 0.03    | 0.03    | 0.05     | 0.03     | 0.03     | 0.04     | 0.04     | 0.03     | 0.02     | 0.04    | 0.03    | 0.05    | 0.02    | 0.04    | 0.03    | 0.02    | 0.03    | 0.01     | 0.02     | 0.02     | 0.01     | 0.02     | 0.01     |

Sample size (n): 15

**Statistics Analysis**  
Test: unpaired t-test

| % of contraction force | Normal  |      | Affected |      | % of contraction force | P Value |
|------------------------|---------|------|----------|------|------------------------|---------|
|                        | Average | SD   | Average  | SD   |                        |         |
| 0-10                   | 0.46    | 0.07 | 0.30     | 0.10 | 0-10                   | 0.0003  |
| 10-20                  | 0.61    | 0.11 | 0.48     | 0.15 | 10-20                  | 0.0288  |
| 20-30                  | 0.59    | 0.13 | 0.46     | 0.14 | 20-30                  | 0.0288  |
| 30-40                  | 0.52    | 0.12 | 0.41     | 0.12 | 30-40                  | 0.0288  |
| 40-50                  | 0.49    | 0.11 | 0.35     | 0.11 | 40-50                  | 0.0128  |
| 50-60                  | 0.37    | 0.08 | 0.29     | 0.09 | 50-60                  | 0.0288  |
| 60-70                  | 0.29    | 0.05 | 0.22     | 0.07 | 60-70                  | 0.0182  |
| 70-80                  | 0.22    | 0.04 | 0.16     | 0.05 | 70-80                  | 0.0155  |
| 80-90                  | 0.15    | 0.03 | 0.11     | 0.03 | 80-90                  | 0.0093  |
| 90-100                 | 0.05    | 0.02 | 0.02     | 0.01 | 90-100                 | 0.0155  |

**Fig. 5D**  
Average -df/dt (N/msec)

| % of relaxation force | Normal  |         |         |         |         |         |         |         |         |          |          |          |          |          |          | Affected |         |         |         |         |         |         |         |         |          |          |          |          |          |          |
|-----------------------|---------|---------|---------|---------|---------|---------|---------|---------|---------|----------|----------|----------|----------|----------|----------|----------|---------|---------|---------|---------|---------|---------|---------|---------|----------|----------|----------|----------|----------|----------|
|                       | Dog # 1 | Dog # 2 | Dog # 3 | Dog # 4 | Dog # 5 | Dog # 6 | Dog # 7 | Dog # 8 | Dog # 9 | Dog # 10 | Dog # 11 | Dog # 12 | Dog # 13 | Dog # 14 | Dog # 15 | Dog # 1  | Dog # 2 | Dog # 3 | Dog # 4 | Dog # 5 | Dog # 6 | Dog # 7 | Dog # 8 | Dog # 9 | Dog # 10 | Dog # 11 | Dog # 12 | Dog # 13 | Dog # 14 | Dog # 15 |
|                       | 0-10    | 0.00    | -0.02   | -0.01   | -0.01   | -0.01   | -0.01   | -0.04   | 0.00    | -0.01    | -0.01    | 0.00     | -0.01    | 0.00     | -0.01    | -0.01    | 0.00    | 0.00    | -0.01   | 0.00    | 0.00    | 0.00    | -0.01   | 0.00    | 0.00     | -0.01    | -0.01    | 0.00     | 0.00     | 0.00     |
| 10-20                 | -0.59   | -0.64   | -0.45   | -0.18   | -0.16   | -0.18   | -0.41   | -0.44   | -0.67   | -0.94    | -0.64    | -0.32    | -0.65    | -0.57    | -0.54    | -0.28    | -0.42   | -0.45   | -0.36   | -0.18   | -0.25   | -0.42   | -0.40   | -0.40   | -0.17    | -0.41    | -0.31    | -0.24    | -0.41    | -0.20    |
| 20-30                 | -1.11   | -1.19   | -0.87   | -0.79   | -0.76   | -0.77   | -0.85   | -0.94   | -1.18   | -1.55    | -1.05    | -1.06    | -1.14    | -1.29    | -0.96    | -0.64    | -0.79   | -0.82   | -0.75   | -0.41   | -0.61   | -0.90   | -0.68   | -0.86   | -0.53    | -0.92    | -0.63    | -0.51    | -0.74    | -0.43    |
| 30-40                 | -1.45   | -1.50   | -1.06   | -1.17   | -1.19   | -1.24   | -1.10   | -1.37   | -1.60   | -2.12    | -1.47    | -1.55    | -1.49    | -1.92    | -1.29    | -0.89    | -1.13   | -1.16   | -1.23   | -0.60   | -0.90   | -1.23   | -0.88   | -1.21   | -0.84    | -1.37    | -1.02    | -0.78    | -1.09    | -0.61    |
| 40-50                 | -1.84   | -1.81   | -1.34   | -1.55   | -1.62   | -1.70   | -1.35   | -1.81   | -2.07   | -2.72    | -1.86    | -1.98    | -1.66    | -2.46    | -1.62    | -1.10    | -1.51   | -1.46   | -1.72   | -0.77   | -1.12   | -1.55   | -1.09   | -1.54   | -1.11    | -1.76    | -1.38    | -1.04    | -1.45    | -0.77    |
| 50-60                 | -2.24   | -2.16   | -1.72   | -1.90   | -2.09   | -2.16   | -1.66   | -2.12   | -2.46   | -3.15    | -2.13    | -2.30    | -1.64    | -2.78    | -1.89    | -1.27    | -1.81   | -1.66   | -2.11   | -0.89   | -1.29   | -1.89   | -1.27   | -1.81   | -1.29    | -2.02    | -1.62    | -1.22    | -1.71    | -0.91    |
| 60-70                 | -2.45   | -2.36   | -1.96   | -2.06   | -2.40   | -2.41   | -1.83   | -2.21   | -2.58   | -3.23    | -2.18    | -2.40    | -1.42    | -2.77    | -2.02    | -1.36    | -1.94   | -1.73   | -2.32   | -0.94   | -1.36   | -2.10   | -1.37   | -1.93   | -1.36    | -2.10    | -1.71    | -1.29    | -1.81    | -0.97    |
| 70-80                 | -2.32   | -2.22   | -1.93   | -1.91   | -2.42   | -2.32   | -1.72   | -2.01   | -2.32   | -2.85    | -1.99    | -2.16    | -1.11    | -2.38    | -1.94    | -1.32    | -1.84   | -1.63   | -2.27   | -0.88   | -1.29   | -2.08   | -1.32   | -1.83   | -1.28    | -1.98    | -1.62    | -1.22    | -1.70    | -0.94    |
| 80-90                 | -1.71   | -1.59   | -1.51   | -1.33   | -2.00   | -1.72   | -1.25   | -1.42   | -1.54   | -1.89    | -1.43    | -1.46    | -0.92    | -1.56    | -1.53    | -1.08    | -1.42   | -1.31   | -1.86   | -0.67   | -1.02   | -1.69   | -1.06   | -1.41   | -1.01    | -1.58    | -1.29    | -0.96    | -1.32    | -0.74    |
| 90-100                | -0.19   | -0.18   | -0.16   | -0.16   | -0.17   | -0.19   | -0.12   | -0.17   | -0.19   | -0.25    | -0.16    | -0.19    | -0.20    | -0.22    | -0.16    | -0.11    | -0.14   | -0.13   | -0.20   | -0.07   | -0.11   | -0.15   | -0.11   | -0.16   | -0.11    | -0.15    | -0.12    | -0.10    | -0.13    | -0.08    |

Sample size (n): 15

**Statistics Analysis**  
Test: unpaired t-test

| % of contraction force | Normal  |      | Affected |      | % of contraction force | P Value |
|------------------------|---------|------|----------|------|------------------------|---------|
|                        | Average | SD   | Average  | SD   |                        |         |
| 0-10                   | -0.01   | 0.01 | 0.00     | 0.00 | 0-10                   | 0.0342  |
| 10-20                  | -0.49   | 0.22 | -0.33    | 0.10 | 10-20                  | 0.0342  |
| 20-30                  | -1.04   | 0.22 | -0.68    | 0.16 | 20-30                  | 0.0002  |
| 30-40                  | -1.43   | 0.29 | -1.00    | 0.23 | 30-40                  | 0.0008  |
| 40-50                  | -1.83   | 0.37 | -1.29    | 0.31 | 40-50                  | 0.0011  |
| 50-60                  | -2.16   | 0.41 | -1.52    | 0.38 | 50-60                  | 0.0009  |
| 60-70                  | -2.29   | 0.42 | -1.62    | 0.42 | 60-70                  | 0.0010  |
| 70-80                  | -2.11   | 0.39 | -1.55    | 0.41 | 70-80                  | 0.0027  |
| 80-90                  | -1.52   | 0.26 | -1.23    | 0.34 | 80-90                  | 0.0342  |
| 90-100                 | -0.18   | 0.03 | -0.12    | 0.03 | 90-100                 | 0.0002  |

| <b>Fig. 5F</b>                    |                 |
|-----------------------------------|-----------------|
| <b>FWHM at contraction (msec)</b> |                 |
| <b>Normal</b>                     | <b>Affected</b> |
| 150.50                            | 170.80          |
| 127.70                            | 142.70          |
| 141.90                            | 104.40          |
| 260.30                            | 100.70          |
| 231.30                            | 152.90          |
| 155.00                            | 100.00          |
| 135.80                            | 121.00          |
| 191.40                            | 108.10          |
| 174.20                            | 128.30          |
| 165.90                            | 109.00          |
| 168.10                            | 135.80          |
| 153.70                            | 132.60          |
| 174.10                            | 151.50          |
| 155.00                            | 141.10          |
| 175.10                            | 141.00          |

**Average:** 170.70      129.30  
**SD:** 35.14      21.56  
**Sample size (n):** 15      15

**Statistics Analysis**  
**Test:** unpaired *t*-test  
**P value:** 0.0006

| <b>Fig. 5H</b>                   |                 |
|----------------------------------|-----------------|
| <b>FWHM at relaxation (msec)</b> |                 |
| <b>Normal</b>                    | <b>Affected</b> |
| 49.00                            | 45.70           |
| 55.90                            | 35.30           |
| 46.70                            | 38.20           |
| 40.70                            | 36.30           |
| 44.10                            | 48.60           |
| 57.00                            | 34.30           |
| 45.60                            | 46.30           |
| 55.60                            | 40.10           |
| 47.00                            | 41.30           |
| 52.40                            | 45.30           |
| 88.50                            | 47.30           |
| 45.50                            | 45.60           |
| 40.80                            | 51.50           |
| 41.10                            | 41.00           |
| 46.40                            | 48.00           |

**Average:** 50.42      42.99  
**SD:** 11.83      5.32  
**Sample size (n):** 15      15

**Statistics Analysis**  
**Test:** unpaired *t*-test  
**P value:** 0.0347

**Fig. 6A**

| Stimulation frequency (Hz) | Muscle force (N) |         |         |         |         |         |         |          |         |          |          |          |          |          |          |       |        |        |       |       |        |       |        |        |       |       |        |       |        |
|----------------------------|------------------|---------|---------|---------|---------|---------|---------|----------|---------|----------|----------|----------|----------|----------|----------|-------|--------|--------|-------|-------|--------|-------|--------|--------|-------|-------|--------|-------|--------|
|                            | Normal           |         |         |         |         |         |         | Affected |         |          |          |          |          |          |          |       |        |        |       |       |        |       |        |        |       |       |        |       |        |
|                            | Dog # 1          | Dog # 2 | Dog # 3 | Dog # 4 | Dog # 5 | Dog # 6 | Dog # 7 | Dog # 8  | Dog # 9 | Dog # 10 | Dog # 11 | Dog # 12 | Dog # 13 | Dog # 14 | Dog # 15 |       |        |        |       |       |        |       |        |        |       |       |        |       |        |
| 5                          | 25.88            | 20.71   | 13.74   | 18.52   | 16.55   | 17.12   | 15.66   | 14.62    | 18.60   | 22.33    | 12.31    | 16.00    | 18.31    | 18.81    | 14.43    | 6.33  | 13.49  | 13.75  | 6.13  | 12.21 | 11.50  | 9.14  | 15.02  | 10.56  | 10.67 | 11.46 | 11.76  | 12.03 | 10.18  |
| 20                         | 102.23           | 123.68  | 103.80  | 77.63   | 85.57   | 93.31   | 74.31   | 73.87    | 90.07   | 103.33   | 63.98    | 92.45    | 83.29    | 93.01    | 99.98    | 27.50 | 59.19  | 55.08  | 26.82 | 59.10 | 66.31  | 28.40 | 64.55  | 52.17  | 66.71 | 39.16 | 53.04  | 52.44 | 51.85  |
| 40                         | 150.09           | 146.44  | 115.42  | 111.69  | 125.25  | 133.69  | 105.33  | 107.39   | 139.54  | 163.42   | 99.66    | 141.89   | 134.86   | 146.52   | 93.69    | 59.00 | 89.34  | 100.61 | 45.79 | 74.00 | 101.18 | 56.83 | 94.79  | 102.54 | 87.18 | 65.74 | 102.85 | 81.48 | 87.03  |
| 60                         | 169.09           | 154.48  | 118.22  | 125.97  | 141.04  | 146.29  | 114.31  | 119.98   | 153.84  | 181.54   | 109.69   | 157.06   | 148.60   | 164.65   | 108.86   | 72.00 | 101.28 | 119.55 | 55.17 | 83.27 | 114.38 | 67.12 | 108.20 | 122.60 | 94.85 | 75.81 | 120.25 | 89.32 | 103.72 |
| 80                         | 175.11           | 158.54  | 119.83  | 130.69  | 140.78  | 151.76  | 118.85  | 124.81   | 157.80  | 191.39   | 112.81   | 162.37   | 152.97   | 170.67   | 114.53   | 76.15 | 103.00 | 125.77 | 56.21 | 85.63 | 119.73 | 71.10 | 112.45 | 129.57 | 95.75 | 79.70 | 124.30 | 93.53 | 110.46 |
| 100                        | 175.07           | 160.13  | 120.91  | 132.15  | 140.33  | 152.40  | 123.33  | 123.38   | 156.63  | 193.38   | 113.02   | 163.49   | 151.18   | 172.56   | 117.35   | 77.37 | 98.95  | 124.91 | 54.03 | 82.59 | 121.43 | 71.80 | 110.40 | 130.76 | 97.63 | 80.62 | 125.30 | 93.76 | 111.13 |
| 120                        | 166.62           | 158.60  | 120.43  | 129.53  | 140.06  | 152.91  | 127.66  | 118.95   | 149.78  | 193.25   | 110.35   | 162.13   | 145.97   | 173.49   | 117.35   | 76.84 | 92.03  | 122.00 | 50.41 | 76.75 | 121.56 | 71.92 | 105.50 | 130.30 | 97.99 | 80.19 | 116.13 | 92.60 | 109.50 |

Sample size (n):

**Statistics Analysis**

Test: unpaired t-test

| % of contraction force | Normal  |       | Affected |       |
|------------------------|---------|-------|----------|-------|
|                        | Average | SD    | Average  | SD    |
| 5                      | 17.57   | 3.52  | 11.02    | 2.53  |
| 20                     | 88.71   | 16.97 | 49.47    | 13.89 |
| 40                     | 127.66  | 21.01 | 82.03    | 18.90 |
| 60                     | 141.11  | 23.67 | 94.84    | 21.66 |
| 80                     | 145.33  | 24.47 | 98.96    | 22.81 |
| 100                    | 146.42  | 24.32 | 98.41    | 22.98 |
| 120                    | 144.47  | 23.87 | 95.99    | 22.96 |

| % of contraction on force | P Value |
|---------------------------|---------|
|                           |         |
| 0.0000                    | 10.20   |
| 0.0000                    | 20.30   |
| 0.0000                    | 30.40   |
| 0.0000                    | 40.50   |
| 0.0000                    | 50.60   |
| 0.0000                    | 60.70   |

**Fig. 6B**

| Stimulation frequency (Hz) | Muscle force (N/cm <sup>2</sup> ) |         |         |         |         |         |         |          |         |          |          |          |          |          |          |      |      |       |      |       |      |      |       |       |      |      |      |       |       |
|----------------------------|-----------------------------------|---------|---------|---------|---------|---------|---------|----------|---------|----------|----------|----------|----------|----------|----------|------|------|-------|------|-------|------|------|-------|-------|------|------|------|-------|-------|
|                            | Normal                            |         |         |         |         |         |         | Affected |         |          |          |          |          |          |          |      |      |       |      |       |      |      |       |       |      |      |      |       |       |
|                            | Dog # 1                           | Dog # 2 | Dog # 3 | Dog # 4 | Dog # 5 | Dog # 6 | Dog # 7 | Dog # 8  | Dog # 9 | Dog # 10 | Dog # 11 | Dog # 12 | Dog # 13 | Dog # 14 | Dog # 15 |      |      |       |      |       |      |      |       |       |      |      |      |       |       |
| 5                          | 1.52                              | 1.59    | 1.23    | 1.45    | 1.24    | 1.35    | 1.26    | 1.21     | 1.30    | 1.31     | 1.08     | 0.95     | 1.11     | 1.16     | 1.43     | 0.78 | 1.13 | 1.12  | 0.78 | 1.55  | 0.85 | 0.97 | 1.41  | 0.97  | 0.82 | 0.91 | 0.79 | 1.36  | 1.02  |
| 20                         | 6.06                              | 9.63    | 9.29    | 6.10    | 6.65    | 7.37    | 6.14    | 6.32     | 6.05    | 5.61     | 5.49     | 5.54     | 5.75     | 5.94     | 5.26     | 5.06 | 6.47 | 3.41  | 6.36 | 4.91  | 3.01 | 6.08 | 4.78  | 5.15  | 3.12 | 3.56 | 5.92 | 5.12  |       |
| 40                         | 8.90                              | 11.22   | 10.33   | 8.75    | 9.41    | 10.56   | 8.49    | 8.92     | 9.78    | 9.57     | 8.74     | 8.43     | 8.16     | 9.06     | 9.27     | 6.98 | 7.63 | 8.17  | 5.83 | 9.39  | 7.52 | 6.03 | 8.93  | 9.39  | 6.73 | 5.24 | 6.91 | 9.20  | 8.73  |
| 60                         | 10.03                             | 11.83   | 10.58   | 9.87    | 10.60   | 11.56   | 9.21    | 9.97     | 10.79   | 10.81    | 9.62     | 9.33     | 9.00     | 10.19    | 10.77    | 8.53 | 8.65 | 9.71  | 7.02 | 10.56 | 8.51 | 7.12 | 10.19 | 11.23 | 7.32 | 6.05 | 8.07 | 10.08 | 10.40 |
| 80                         | 10.38                             | 12.14   | 10.72   | 10.24   | 10.58   | 11.89   | 9.88    | 10.37    | 11.86   | 11.21    | 9.98     | 9.64     | 9.26     | 10.56    | 11.54    | 9.01 | 8.80 | 10.22 | 7.15 | 10.86 | 8.89 | 7.54 | 10.59 | 11.87 | 7.54 | 6.38 | 8.35 | 10.56 | 11.88 |
| 100                        | 10.38                             | 12.27   | 10.82   | 10.35   | 10.54   | 12.04   | 9.94    | 10.25    | 10.98   | 11.33    | 9.92     | 9.71     | 9.21     | 10.68    | 11.61    | 9.15 | 8.46 | 10.15 | 6.88 | 10.48 | 9.02 | 7.61 | 10.40 | 11.97 | 7.53 | 6.43 | 8.21 | 10.58 | 11.15 |
| 120                        | 9.88                              | 12.15   | 10.77   | 10.15   | 10.52   | 12.08   | 10.29   | 9.88     | 10.50   | 11.32    | 9.68     | 9.63     | 8.84     | 10.73    | 11.62    | 9.09 | 7.86 | 9.91  | 6.43 | 9.74  | 9.03 | 7.63 | 9.93  | 11.93 | 7.56 | 6.40 | 7.80 | 10.45 | 10.98 |

Sample size (n):

**Statistics Analysis**

Test: unpaired t-test

| % of contraction force | Normal  |      | Affected |      |
|------------------------|---------|------|----------|------|
|                        | Average | SD   | Average  | SD   |
| 5                      | 1.28    | 0.17 | 1.03     | 0.25 |
| 20                     | 6.52    | 1.29 | 4.59     | 1.14 |
| 40                     | 9.31    | 0.86 | 7.62     | 1.39 |
| 60                     | 10.28   | 0.82 | 8.82     | 1.58 |
| 80                     | 10.60   | 0.84 | 9.20     | 1.69 |
| 100                    | 10.67   | 0.86 | 9.14     | 1.69 |
| 120                    | 10.54   | 0.94 | 8.91     | 1.68 |

| % of contraction on force | P Value |
|---------------------------|---------|
|                           |         |
| 0.0055                    | 10.20   |
| 0.0016                    | 20.30   |
| 0.0017                    | 30.40   |
| 0.0055                    | 40.50   |
| 0.0084                    | 50.60   |
| 0.0055                    | 60.70   |

**Fig. 6C**

| Stimulation frequency (Hz) | % of Maximum force |         |         |         |         |         |         |          |         |          |          |          |          |          |          |        |        |        |        |        |        |        |       |        |       |        |       |        |        |
|----------------------------|--------------------|---------|---------|---------|---------|---------|---------|----------|---------|----------|----------|----------|----------|----------|----------|--------|--------|--------|--------|--------|--------|--------|-------|--------|-------|--------|-------|--------|--------|
|                            | Normal             |         |         |         |         |         |         | Affected |         |          |          |          |          |          |          |        |        |        |        |        |        |        |       |        |       |        |       |        |        |
|                            | Dog # 1            | Dog # 2 | Dog # 3 | Dog # 4 | Dog # 5 | Dog # 6 | Dog # 7 | Dog # 8  | Dog # 9 | Dog # 10 | Dog # 11 | Dog # 12 | Dog # 13 | Dog # 14 | Dog # 15 |        |        |        |        |        |        |        |       |        |       |        |       |        |        |
| 5                          | 14.73              | 12.93   | 11.36   | 14.03   | 11.73   | 11.23   | 11.72   | 11.79    | 11.55   | 10.89    | 9.79     | 11.97    | 10.84    | 12.30    | 8.14     | 13.00  | 10.94  | 10.91  | 14.26  | 9.46   | 12.71  | 13.35  | 8.68  | 10.89  | 14.22 | 9.46   | 12.83 | 9.16   |        |
| 20                         | 58.38              | 78.48   | 85.83   | 58.89   | 62.80   | 61.02   | 58.21   | 59.18    | 57.08   | 53.43    | 56.61    | 56.55    | 57.71    | 53.61    | 51.11    | 35.66  | 57.47  | 43.76  | 47.71  | 58.51  | 54.57  | 39.49  | 57.40 | 39.90  | 68.08 | 48.58  | 42.67 | 55.93  | 45.94  |
| 40                         | 85.71              | 91.45   | 95.44   | 84.52   | 88.80   | 87.43   | 82.51   | 86.04    | 88.43   | 84.51    | 86.78    | 86.79    | 86.16    | 84.46    | 79.83    | 76.26  | 86.74  | 79.99  | 81.44  | 86.42  | 83.24  | 79.01  | 84.30 | 78.31  | 88.97 | 81.54  | 82.74 | 86.91  | 78.31  |
| 60                         | 96.57              | 96.47   | 97.77   | 100.00  | 95.32   | 100.00  | 97.06   | 96.07    | 97.14   | 94.91    | 92.76    | 93.18    | 98.33    | 95.06    | 98.13    | 97.25  | 94.26  | 93.33  | 96.22  | 93.76  | 96.79  | 94.04  | 96.74 | 95.27  | 93.33 |        |       |        |        |
| 80                         | 100.00             | 99.00   | 99.00   | 98.89   | 99.82   | 99.25   | 93.10   | 100.00   | 100.00  | 99.87    | 99.81    | 99.32    | 100.00   | 98.38    | 97.59    | 98.42  | 100.00 | 100.00 | 100.00 | 98.50  | 98.36  | 100.00 | 99.19 | 99.75  | 98.87 | 100.00 | 99.76 | 99.39  |        |
| 100                        | 99.98              | 100.00  | 100.00  | 100.00  | 99.49   | 99.66   | 96.61   | 98.86    | 99.26   | 100.00   | 100.00   | 100.00   | 99.48    | 99.47    | 100.00   | 100.00 | 96.07  | 99.34  | 96.09  | 96.46  | 99.90  | 99.84  | 98.18 | 100.00 | 99.63 | 100.00 | 98.38 | 100.00 | 100.00 |
| 120                        | 95.15              | 99.04   | 99.59   | 98.01   | 99.31   | 100.00  | 100.00  | 95.31    | 94.92   | 99.93    | 97.64    | 99.17    | 95.42    | 100.00   | 99.31    | 89.35  | 97.00  | 89.84  | 89.63  | 100.00 | 100.00 | 93.81  | 99.65 | 100.00 | 99.47 | 93.42  | 98.77 | 98.33  |        |

Sample size (n):

**Statistics Analysis**

Test: unpaired t-test

| % of contraction force | Normal  |      | Affected |      |
|------------------------|---------|------|----------|------|
|                        | Average | SD   | Average  | SD   |
| 5                      | 11.94   | 1.24 | 11.25    | 2.16 |
| 20                     | 60.59   | 9.34 | 49.69    | 9.19 |
| 40                     | 86.82   | 3.70 | 82.45    | 3.85 |
| 60                     | 95.89   | 2.37 | 95.41    | 1.83 |
| 80                     | 98.88   | 1.74 | 99.47    | 0.61 |
| 100                    | 99.52   | 0.88 | 98.35    | 1.55 |
| 120                    | 98.23   | 2.02 | 96.34    | 4.22 |

| % of contraction on force | P Value |
|---------------------------|---------|
|                           |         |
| 0.3515                    | 10.20   |
| 0.0152                    | 20.30   |
| 0.0152                    | 30.40   |
| 0.5510                    | 40.50   |
| 0.3369                    | 50.60   |
| 0.2818                    | 60.70   |

**Fig. 6D**

| ECC cycle | Muscle force (% of initial) |         |         |         |         |         |         |          |         |          |          |          |          |          |          |        |        |        |        |        |        |        |        |        |        |        |        |        |        |
|-----------|-----------------------------|---------|---------|---------|---------|---------|---------|----------|---------|----------|----------|----------|----------|----------|----------|--------|--------|--------|--------|--------|--------|--------|--------|--------|--------|--------|--------|--------|--------|
|           | Normal                      |         |         |         |         |         |         | Affected |         |          |          |          |          |          |          |        |        |        |        |        |        |        |        |        |        |        |        |        |        |
|           | Dog # 1                     | Dog # 2 | Dog # 3 | Dog # 4 | Dog # 5 | Dog # 6 | Dog # 7 | Dog # 8  | Dog # 9 | Dog # 10 | Dog # 11 | Dog # 12 | Dog # 13 | Dog # 14 | Dog # 15 |        |        |        |        |        |        |        |        |        |        |        |        |        |        |
| 1         | 100.00                      | 100.00  | 100.00  | 100.00  | 100.00  | 100.00  | 100.00  | 100.00   | 100.00  | 100.00   | 100.00   | 100.00   | 100.00   | 100.00   | 100.00   | 100.00 | 100.00 | 100.00 | 100.00 | 100.00 | 100.00 | 100.00 | 100.00 | 100.00 | 100.00 | 100.00 | 100.00 | 100.00 | 100.00 |
| 2         | 100.51                      | 87.39   | 99.36   | 100.12  | 104.18  | 103.42  | 98.55   | 99.27    | 95.47   | 98.92    | 98.33    | 101.29   | 87.18    | 89.94    | 78.73    | 87.72  | 89.82  | 87.32  | 93.14  | 82.97  | 88.63  | 94.26  | 97.10  | 92.25  | 92.23  | 97.08  | 87.67  |        |        |
| 3         | 98.90                       | 86.56   | 98.73   | 97.61   | 102.99  | 89.75   | 96.40   | 98.11    | 94.75   | 98.32    | 97.41    | 74.63    | 78.94    | 81.95    | 53.60    | 76.43  | 81.32  | 77.90  | 80.60  | 67.71  | 79.39  | 89.84  | 84.88  | 84.18  | 90.21  | 92.37  | 77.46  |        |        |
| 4         | 99.24                       | 86.63   | 98.07   | 96.93   | 100.24  | 78.34   | 96.40   | 97.54    | 94.22   | 98.24    | 97.34    | 83.10    | 73.42    | 77.24    | 46.26    | 67.93  | 74.78  | 71.38  | 67.06  | 54.16  | 71.59  | 85.54  | 84.84  | 74.48  | 81.73  | 87.25  | 76.43  |        |        |
| 5         | 101.84                      | 87.20   | 97.47   | 95.28   | 96.39   | 89.23   | 96.04   | 96.90    | 93.43   | 98.08    | 97.01    | 81.04    | 69.04    | 70.85    | 39.76    | 60.84  | 69.52  | 67.45  | 56.78  | 43.61  | 65.99  | 82.46  | 54.38  | 66.80  | 83.65  | 83.32  | 65.32  |        |        |
| 6         | 99.87                       | 86.00   | 96.24   | 92.99   | 94.88   | 89.92   | 96.86   | 96.50    | 92.83   | 98.14    | 96.80    | 80.21    | 66.18    | 67.54    | 33.39    | 55.97  | 64.66  | 63.42  | 50.15  | 34.77  | 59.83  | 78.54  | 48.58  | 60.83  | 80.98  | 79.89  | 61.57  |        |        |
| 7         | 98.30                       | 91.68   | 95.66   | 92.45   | 95.71   | 90.95   | 96.65   | 96.01    | 92.33   | 98.48    | 98.60    | 81.13    | 63.15    | 66.96    | 34.31    | 52.23  | 60.89  | 60.68  | 45.87  | 28.74  | 55.60  | 73.71  | 44.26  | 55.69  | 78.48  | 76.47  | 58.42  |        |        |
| 8         | 100.31                      | 90.72   | 94.23   | 92.00   |         |         |         |          |         |          |          |          |          |          |          |        |        |        |        |        |        |        |        |        |        |        |        |        |        |

**Fig. 7B**

| MyHC isoforms | % of myofibers |         |         |         |         |         |          |         |         |         |         |         |         |         |
|---------------|----------------|---------|---------|---------|---------|---------|----------|---------|---------|---------|---------|---------|---------|---------|
|               | Normal         |         |         |         |         |         | Affected |         |         |         |         |         |         |         |
|               | Dog # 1        | Dog # 2 | Dog # 3 | Dog # 4 | Dog # 5 | Dog # 6 | Dog # 1  | Dog # 2 | Dog # 3 | Dog # 4 | Dog # 5 | Dog # 6 | Dog # 7 | Dog # 8 |
| I             | 71.68          | 65.74   | 76.16   | 61.86   | 68.30   | 57.81   | 28.37    | 34.90   | 37.87   | 25.92   | 27.95   | 24.94   | 23.71   | 15.83   |
| I/IIa         | 0.48           | 0.00    | 1.02    | 0.00    | 0.94    | 0.48    | 19.61    | 12.89   | 6.84    | 14.95   | 20.07   | 2.68    | 2.85    | 14.29   |
| IIa           | 27.84          | 34.26   | 22.82   | 38.14   | 30.76   | 41.71   | 52.02    | 52.21   | 55.28   | 59.13   | 51.98   | 72.38   | 73.44   | 69.88   |

Sample size (n):

6

8

**Statistics Analysis**

Test: unpaired *t*-test

| MyHC isoforms | Normal  |      | Affected |      |
|---------------|---------|------|----------|------|
|               | Average | SD   | Average  | SD   |
| I             | 66.93   | 6.63 | 27.44    | 6.79 |
| I/IIa         | 0.49    | 0.44 | 11.77    | 6.91 |
| IIa           | 32.59   | 6.90 | 60.79    | 9.55 |

| MyHC isoforms | P Value |
|---------------|---------|
| I             | 0.0000  |
| I/IIa         | 0.0019  |
| IIa           | 0.0001  |

**Fig. 7C**

| MyHC isoforms | Relative percentage (%) |         |         |          |         |         |
|---------------|-------------------------|---------|---------|----------|---------|---------|
|               | Normal                  |         |         | Affected |         |         |
|               | Dog # 1                 | Dog # 2 | Dog # 3 | Dog # 1  | Dog # 2 | Dog # 3 |
| I             | 55.55                   | 55.54   | 47.69   | 28.60    | 33.97   | 44.62   |
| IIa           | 44.45                   | 44.46   | 52.31   | 71.40    | 66.03   | 55.38   |

Sample size (n):

3

3

**Statistics Analysis**

Test: unpaired *t*-test

| MyHC isoforms | Normal  |      | Affected |      |
|---------------|---------|------|----------|------|
|               | Average | SD   | Average  | SD   |
| I             | 52.93   | 4.54 | 35.73    | 8.15 |
| IIa           | 47.07   | 4.54 | 64.27    | 8.15 |

| MyHC isoforms | P Value |
|---------------|---------|
| I             | 0.0331  |
| IIa           | 0.0331  |

**Fig. 7B**

| Transcript | Transcript copy (copy/ng) |         |         |         |         |         |          |         |         |         |         |         |         |
|------------|---------------------------|---------|---------|---------|---------|---------|----------|---------|---------|---------|---------|---------|---------|
|            | Normal                    |         |         |         |         |         | Affected |         |         |         |         |         |         |
|            | Dog # 1                   | Dog # 2 | Dog # 3 | Dog # 4 | Dog # 5 | Dog # 6 | Dog # 1  | Dog # 2 | Dog # 3 | Dog # 4 | Dog # 5 | Dog # 6 | Dog # 7 |
| MyHC7      | 1.4E+05                   | 7.5E+04 | 1.3E+05 | 5.6E+04 | 1.1E+05 | 8.3E+04 | 4.8E+04  | 4.0E+04 | 2.9E+04 | 3.4E+04 | 7.7E+04 | 5.0E+04 | 9.0E+04 |
| MyHC2      | 9.0E+04                   | 5.9E+04 | 1.0E+05 | 5.4E+04 | 4.6E+04 | 4.6E+04 | 1.1E+05  | 6.4E+04 | 2.7E+04 | 7.1E+04 | 1.2E+05 | 1.5E+05 | 1.3E+05 |
| MyHC1      | 8.4E+02                   | 5.2E+02 | 1.3E+03 | 4.3E+02 | 4.8E+02 | 3.5E+02 | 4.6E+03  | 9.9E+02 | 3.1E+03 | 2.0E+03 | 3.5E+03 | 1.4E+03 | 1.4E+03 |
| MyHC4      | 1.0E+00                   | 1.0E+00 | 0.0E+00 | 0.0E+00 | 0.0E+00 | 0.0E+00 | 2.0E+01  | 2.3E+01 | 1.8E+01 | 9.0E+00 | 4.0E+00 | 1.6E+01 | 3.1E+01 |

Sample size (n):

6

8

**Statistics Analysis**

Test: unpaired *t*-test

| Transcript | Normal  |         | Affected |         |
|------------|---------|---------|----------|---------|
|            | Average | SD      | Average  | SD      |
| MyHC7      | 1.0E+05 | 3.5E+04 | 5.2E+04  | 2.3E+04 |
| MyHC2      | 6.7E+04 | 2.4E+04 | 9.5E+04  | 4.2E+04 |
| MyHC1      | 6.6E+02 | 3.7E+02 | 2.1E+03  | 1.5E+03 |
| MyHC4      | 3.3E-01 | 5.2E-01 | 1.7E+01  | 8.9E+00 |

| Transcript | P Value |
|------------|---------|
| MyHC7      | 0.0208  |
| MyHC2      | 0.2547  |
| MyHC1      | 0.0177  |
| MyHC4      | 0.0021  |

**Table 1**

| Dog name       | Age (Year) | Body weigh (kg) | ECU muscle weight (g) | ECU weight/body weight (g/kg) | ECU muscle length (cm) | pCSA (cm <sup>2</sup> ) |
|----------------|------------|-----------------|-----------------------|-------------------------------|------------------------|-------------------------|
| Normal         | 2.16       | 34.47           | 12.93                 | 0.38                          | 15.96                  | 16.86                   |
|                | 2.28       | 19.50           | 9.22                  | 0.47                          | 14.70                  | 13.06                   |
|                | 2.50       | 17.24           | 6.09                  | 0.35                          | 11.34                  | 11.18                   |
|                | 2.62       | 18.51           | 8.50                  | 0.46                          | 13.86                  | 12.77                   |
|                | 2.82       | 20.41           | 9.40                  | 0.46                          | 14.70                  | 13.31                   |
|                | 2.82       | 20.41           | 8.94                  | 0.44                          | 14.70                  | 12.66                   |
|                | 2.82       | 15.38           | 7.26                  | 0.47                          | 12.18                  | 12.41                   |
|                | 3.07       | 16.92           | 6.80                  | 0.40                          | 11.76                  | 12.04                   |
|                | 3.09       | 22.72           | 10.36                 | 0.46                          | 15.12                  | 14.26                   |
|                | 3.19       | 23.59           | 12.40                 | 0.53                          | 15.12                  | 17.07                   |
|                | 3.20       | 21.45           | 7.13                  | 0.33                          | 13.02                  | 11.40                   |
|                | 3.40       | 20.41           | 12.23                 | 0.60                          | 15.12                  | 16.84                   |
|                | 3.42       | 20.46           | 12.00                 | 0.59                          | 15.12                  | 16.52                   |
|                | 3.47       | 27.22           | 12.72                 | 0.47                          | 16.38                  | 16.16                   |
| 3.54           | 19.73      | 6.32            | 0.32                  | 13.02                         | 10.10                  |                         |
| <b>Min</b>     | 2.16       | 15.38           | 6.09                  | 0.32                          | 11.34                  | 10.10                   |
| <b>Max</b>     | 3.54       | 34.47           | 12.93                 | 0.60                          | 16.38                  | 17.07                   |
| <b>Average</b> | 2.96       | 21.23           | 9.49                  | 0.45                          | 14.14                  | 13.78                   |
| <b>SD</b>      | 0.43       | 4.65            | 2.48                  | 0.08                          | 1.54                   | 2.35                    |
| Affected       | 2.48       | 15.24           | 5.63                  | 0.37                          | 13.86                  | 8.46                    |
|                | 2.55       | 21.59           | 7.32                  | 0.34                          | 13.02                  | 11.70                   |
|                | 2.75       | 20.09           | 8.13                  | 0.40                          | 14.28                  | 11.85                   |
|                | 2.78       | 20.09           | 9.44                  | 0.47                          | 15.96                  | 12.31                   |
|                | 2.86       | 15.83           | 4.44                  | 0.28                          | 11.76                  | 7.86                    |
|                | 2.90       | 15.20           | 5.09                  | 0.33                          | 13.44                  | 7.88                    |
|                | 3.02       | 19.87           | 9.78                  | 0.49                          | 15.12                  | 13.46                   |
|                | 3.02       | 14.88           | 6.09                  | 0.41                          | 13.44                  | 9.43                    |
|                | 3.22       | 20.41           | 7.50                  | 0.37                          | 14.70                  | 10.62                   |
|                | 3.47       | 22.90           | 8.37                  | 0.37                          | 15.96                  | 10.92                   |
|                | 3.48       | 22.13           | 8.63                  | 0.39                          | 13.86                  | 12.96                   |
|                | 3.49       | 17.41           | 7.59                  | 0.44                          | 12.60                  | 12.54                   |
|                | 3.50       | 29.84           | 11.72                 | 0.39                          | 16.38                  | 14.89                   |
|                | 3.65       | 14.74           | 5.72                  | 0.39                          | 13.44                  | 8.86                    |
| 3.73           | 19.00      | 6.84            | 0.36                  | 14.28                         | 9.97                   |                         |
| <b>Min</b>     | 2.78       | 14.74           | 4.44                  | 0.28                          | 11.76                  | 7.86                    |
| <b>Max</b>     | 3.65       | 29.84           | 11.72                 | 0.49                          | 16.38                  | 14.89                   |
| <b>Average</b> | 3.13       | 19.28           | 7.49                  | 0.39                          | 14.14                  | 10.91                   |
| <b>SD</b>      | 0.41       | 4.05            | 1.95                  | 0.05                          | 1.31                   | 2.15                    |
| <b>P value</b> | 0.2913     | 0.2318          | 0.0206                | 0.0225                        | 1.0000                 | 0.0016                  |



**Fig. S1**

| <b>Dog name</b> | <b>Body weigh<br/>(kg)</b> | <b>ECU muscle<br/>weight<br/>(g)</b> | <b>pCSA<br/>(cm<sup>2</sup>)</b> |
|-----------------|----------------------------|--------------------------------------|----------------------------------|
| <b>Normal</b>   | 34.47                      | 12.93                                | 16.86                            |
|                 | 19.50                      | 9.22                                 | 13.06                            |
|                 | 17.24                      | 6.09                                 | 11.18                            |
|                 | 18.51                      | 8.50                                 | 12.77                            |
|                 | 20.41                      | 9.40                                 | 13.31                            |
|                 | 20.41                      | 8.94                                 | 12.66                            |
|                 | 15.38                      | 7.26                                 | 12.41                            |
|                 | 16.92                      | 6.80                                 | 12.04                            |
|                 | 22.72                      | 10.36                                | 14.26                            |
|                 | 23.59                      | 12.40                                | 17.07                            |
|                 | 21.45                      | 7.13                                 | 11.40                            |
|                 | 20.41                      | 12.23                                | 16.84                            |
|                 | 20.46                      | 12.00                                | 16.52                            |
|                 | 27.22                      | 12.72                                | 16.16                            |
|                 | 19.73                      | 6.32                                 | 10.10                            |
| <b>Affected</b> | 15.24                      | 5.63                                 | 8.46                             |
|                 | 21.59                      | 7.32                                 | 11.70                            |
|                 | 20.09                      | 8.13                                 | 11.85                            |
|                 | 20.09                      | 9.44                                 | 12.31                            |
|                 | 15.83                      | 4.44                                 | 7.86                             |
|                 | 15.20                      | 5.09                                 | 7.88                             |
|                 | 19.87                      | 9.78                                 | 13.46                            |
|                 | 14.88                      | 6.09                                 | 9.43                             |
|                 | 20.41                      | 7.50                                 | 10.62                            |
|                 | 22.90                      | 8.37                                 | 10.92                            |
|                 | 22.13                      | 8.63                                 | 12.96                            |
|                 | 17.41                      | 7.59                                 | 12.54                            |
|                 | 29.84                      | 11.72                                | 14.89                            |
|                 | 14.74                      | 5.72                                 | 8.86                             |
| 19.00           | 6.84                       | 9.97                                 |                                  |

| <b>Fig. S3</b> |                 |
|----------------|-----------------|
| <b>Pt/Po</b>   |                 |
| <b>Normal</b>  | <b>Affected</b> |
| 0.12           | 0.07            |
| 0.10           | 0.12            |
| 0.12           | 0.09            |
| 0.10           | 0.10            |
| 0.09           | 0.11            |
| 0.09           | 0.08            |
| 0.10           | 0.10            |
| 0.11           | 0.12            |
| 0.11           | 0.07            |
| 0.11           | 0.11            |
| 0.08           | 0.08            |
| 0.10           | 0.12            |
| 0.09           |                 |
| 0.11           |                 |

|                         |      |      |
|-------------------------|------|------|
| <b>Average:</b>         | 0.10 | 0.10 |
| <b>SD:</b>              | 0.01 | 0.02 |
| <b>Sample size (n):</b> | 14   | 12   |

**Statistics Analysis**

**Test:** unpaired *t*-test  
**P value:** 0.4575

| Fig. S6A |          |
|----------|----------|
| Pt/TPT   |          |
| Normal   | Affected |
| 0.21     | 0.10     |
| 0.16     | 0.21     |
| 0.21     | 0.21     |
| 0.19     | 0.09     |
| 0.17     | 0.14     |
| 0.13     | 0.16     |
| 0.18     | 0.16     |
| 0.24     | 0.21     |
| 0.30     | 0.15     |
| 0.19     | 0.18     |
| 0.19     | 0.17     |
| 0.18     | 0.20     |
| 0.18     |          |
| 0.21     |          |

| Fig. S6B |          |
|----------|----------|
| Pt/1/2RT |          |
| Normal   | Affected |
| 0.29     | 0.14     |
| 0.20     | 0.26     |
| 0.21     | 0.23     |
| 0.24     | 0.09     |
| 0.19     | 0.16     |
| 0.15     | 0.18     |
| 0.23     | 0.21     |
| 0.29     | 0.29     |
| 0.42     | 0.17     |
| 0.24     | 0.21     |
| 0.26     | 0.22     |
| 0.22     | 0.19     |
| 0.17     |          |
| 0.25     |          |

| Fig. S6C |          |
|----------|----------|
| Po/TPT   |          |
| Normal   | Affected |
| 0.20     | 0.10     |
| 0.15     | 0.17     |
| 0.17     | 0.15     |
| 0.19     | 0.21     |
| 0.16     | 0.09     |
| 0.16     | 0.17     |
| 0.24     | 0.15     |
| 0.15     | 0.11     |
| 0.20     | 0.14     |
| 0.19     | 0.16     |
| 0.18     | 0.12     |
| 0.14     | 0.11     |
|          | 0.15     |
|          | 0.13     |
|          | 0.14     |

| Fig. S6D |          |
|----------|----------|
| Po/1/2RT |          |
| Normal   | Affected |
| 1.49     | 0.81     |
| 1.35     | 1.06     |
| 1.18     | 1.00     |
| 1.27     | 1.48     |
| 1.34     | 0.56     |
| 1.39     | 0.82     |
| 1.05     | 1.14     |
| 1.26     | 0.81     |
| 1.43     | 1.14     |
| 1.83     | 1.43     |
| 1.20     | 1.07     |
| 1.40     | 0.95     |
| 1.23     | 1.31     |
| 1.58     | 1.01     |
| 1.17     | 1.10     |

Average: 0.20 0.17  
 SD: 0.04 0.04  
 Sample size (n): 14 12

Average: 0.24 0.20  
 SD: 0.07 0.05  
 Sample size (n): 14 12

Average: 0.18 0.14  
 SD: 0.03 0.03  
 Sample size (n): 12 15

Average: 1.35 1.05  
 SD: 0.19 0.24  
 Sample size (n): 15 15

**Statistics Analysis**  
 Test: unpaired *t*-test  
 P value: 0.0470

**Statistics Analysis**  
 Test: unpaired *t*-test  
 P value: 0.0785

**Statistics Analysis**  
 Test: unpaired *t*-test  
 P value: 0.0036

**Statistics Analysis**  
 Test: unpaired *t*-test  
 P value: 0.0009

**Table S1**

| Dog name       | Optimal resting tension (g) | Optimal stimulation current (mA) | Optimal Stimulation duration (msec) | Optimal stimulation frequency (Hz) |
|----------------|-----------------------------|----------------------------------|-------------------------------------|------------------------------------|
| Normal         | 1100                        | 20                               | 800                                 | 80                                 |
|                | 1100                        | 60                               | 800                                 | 80                                 |
|                | 1300                        | 600                              | 500                                 | 80                                 |
|                | 1500                        | 40                               | 800                                 | 100                                |
|                | 1600                        | 40                               | 800                                 | 100                                |
|                | 1400                        | 50                               | 500                                 | 100                                |
|                | 900                         | 60                               | 800                                 | 100                                |
|                | 1463                        | 60                               | 800                                 | 100                                |
|                | 700                         | 80                               | 800                                 | 100                                |
|                | 800                         | 100                              | 800                                 | 100                                |
|                | 1000                        | 200                              | 800                                 | 100                                |
|                | 1000                        | 40                               | 800                                 | 120                                |
|                | 1500                        | 40                               | 800                                 | 120                                |
|                | 2000                        | 40                               | 800                                 | 120                                |
| 1500           | 80                          | 800                              | 120                                 |                                    |
| <b>Min</b>     | 700.00                      | 20.00                            | 500.00                              | 80.00                              |
| <b>Max</b>     | 2000.00                     | 600.00                           | 800.00                              | 120.00                             |
| <b>Average</b> | 1257.53                     | 100.67                           | 760.00                              | 101.33                             |
| <b>SD</b>      | 352.49                      | 144.54                           | 105.56                              | 14.07                              |
| Affected       | 600                         | 60                               | 500                                 | 80                                 |
|                | 1000                        | 20                               | 600                                 | 80                                 |
|                | 600                         | 60                               | 600                                 | 80                                 |
|                | 600                         | 80                               | 600                                 | 80                                 |
|                | 600                         | 100                              | 600                                 | 80                                 |
|                | 1600                        | 20                               | 800                                 | 80                                 |
|                | 400g                        | 40                               | 500                                 | 100                                |
|                | 1100                        | 20                               | 800                                 | 100                                |
|                | 700                         | 20                               | 800                                 | 100                                |
|                | 300                         | 40                               | 800                                 | 100                                |
|                | 500                         | 80                               | 800                                 | 100                                |
|                | 500                         | 200                              | 800                                 | 100                                |
|                | 500                         | 300                              | 800                                 | 100                                |
|                | 900                         | 40                               | 800                                 | 120                                |
| 700            | 80                          | 800                              | 120                                 |                                    |
| <b>Min</b>     | 300.00                      | 20.00                            | 500.00                              | 80.00                              |
| <b>Max</b>     | 1600.00                     | 300.00                           | 800.00                              | 120.00                             |
| <b>Average</b> | 728.57                      | 77.33                            | 706.67                              | 94.67                              |
| <b>SD</b>      | 329.17                      | 77.04                            | 122.28                              | 14.07                              |
| <b>P value</b> | 0.0003                      | 0.5855                           | 0.2115                              | 0.2052                             |

Table S4

| Dog name       | Age (Year) | Body weigh (kg) | ECU muscle weight (g) | ECU weight/body weight (g/kg) | ECU muscle lenght (cm) | pCSA (cm <sup>2</sup> ) | Po (N) | Po/ECU weight (N/g) | Po/pCSA (N/cm <sup>2</sup> ) |
|----------------|------------|-----------------|-----------------------|-------------------------------|------------------------|-------------------------|--------|---------------------|------------------------------|
| Normal         | 2.16       | 34.47           | 12.93                 | 0.38                          | 15.96                  | 16.86                   | 175.11 | 13.54               | 10.38                        |
|                | 2.28       | 19.50           | 9.22                  | 0.47                          | 14.70                  | 13.06                   | 160.13 | 17.37               | 12.27                        |
|                | 2.50       | 17.24           | 6.09                  | 0.35                          | 11.34                  | 11.18                   | 120.93 | 19.86               | 10.82                        |
|                | 2.62       | 18.51           | 8.50                  | 0.46                          | 13.86                  | 12.77                   | 132.15 | 15.55               | 10.35                        |
|                | 2.82       | 20.41           | 9.40                  | 0.46                          | 14.70                  | 13.31                   | 141.04 | 15.00               | 10.60                        |
|                | 2.82       | 20.41           | 8.94                  | 0.44                          | 14.70                  | 12.66                   | 152.91 | 17.10               | 12.08                        |
|                | 2.82       | 15.38           | 7.26                  | 0.47                          | 12.18                  | 12.41                   | 128.56 | 17.71               | 10.36                        |
|                | 3.07       | 16.92           | 6.80                  | 0.40                          | 11.76                  | 12.04                   | 123.38 | 18.14               | 10.25                        |
|                | 3.09       | 22.72           | 10.36                 | 0.46                          | 15.12                  | 14.26                   | 157.80 | 15.23               | 11.06                        |
|                | 3.19       | 23.59           | 12.40                 | 0.53                          | 15.12                  | 17.07                   | 193.38 | 15.60               | 11.33                        |
|                | 3.20       | 21.45           | 7.13                  | 0.33                          | 13.02                  | 11.40                   | 113.02 | 15.85               | 9.92                         |
|                | 3.40       | 20.41           | 12.23                 | 0.60                          | 15.12                  | 16.84                   | 163.49 | 13.37               | 9.71                         |
|                | 3.42       | 20.46           | 12.00                 | 0.59                          | 15.12                  | 16.52                   | 152.97 | 12.75               | 9.26                         |
|                | 3.47       | 27.22           | 12.72                 | 0.47                          | 16.38                  | 16.16                   | 173.49 | 13.64               | 10.73                        |
| 3.54           | 19.73      | 6.32            | 0.32                  | 13.02                         | 10.10                  | 117.35                  | 18.57  | 11.62               |                              |
| <b>Min</b>     | 2.16       | 15.38           | 6.09                  | 0.32                          | 11.34                  | 10.10                   | 113.02 | 12.75               | 9.26                         |
| <b>Max</b>     | 3.54       | 34.47           | 12.93                 | 0.60                          | 16.38                  | 17.07                   | 193.38 | 19.86               | 12.27                        |
| <b>Average</b> | 2.96       | 21.23           | 9.49                  | 0.45                          | 14.14                  | 13.78                   | 147.05 | 15.95               | 10.72                        |
| <b>SD</b>      | 0.43       | 4.65            | 2.48                  | 0.08                          | 1.54                   | 2.35                    | 24.11  | 2.12                | 0.84                         |
| Affected       | 2.48       | 15.24           | 5.63                  | 0.37                          | 13.86                  | 8.46                    | 77.37  | 13.74               | 9.15                         |
|                | 2.55       | 21.59           | 7.32                  | 0.34                          | 13.02                  | 11.70                   | 103.00 | 14.07               | 8.80                         |
|                | 2.75       | 20.09           | 8.13                  | 0.40                          | 14.28                  | 11.85                   | 72.02  | 8.86                | 6.08                         |
|                | 2.78       | 20.09           | 9.44                  | 0.47                          | 15.96                  | 12.31                   | 125.77 | 13.32               | 10.22                        |
|                | 2.86       | 15.83           | 4.44                  | 0.28                          | 11.76                  | 7.86                    | 56.23  | 12.66               | 7.15                         |
|                | 2.90       | 15.20           | 5.09                  | 0.33                          | 13.44                  | 7.88                    | 85.63  | 16.82               | 10.86                        |
|                | 3.02       | 19.87           | 9.78                  | 0.49                          | 15.12                  | 13.46                   | 121.56 | 12.43               | 9.03                         |
|                | 3.02       | 14.88           | 6.09                  | 0.41                          | 13.44                  | 9.43                    | 71.92  | 11.81               | 7.63                         |
|                | 3.22       | 20.41           | 7.50                  | 0.37                          | 14.70                  | 10.62                   | 112.45 | 14.99               | 10.59                        |
|                | 3.47       | 22.90           | 8.37                  | 0.37                          | 15.96                  | 10.92                   | 130.71 | 15.62               | 11.97                        |
|                | 3.48       | 22.13           | 8.63                  | 0.39                          | 13.86                  | 12.96                   | 97.99  | 11.35               | 7.56                         |
|                | 3.49       | 17.41           | 7.59                  | 0.44                          | 12.60                  | 12.54                   | 80.62  | 10.62               | 6.43                         |
|                | 3.50       | 29.84           | 11.72                 | 0.39                          | 16.38                  | 14.89                   | 124.30 | 10.61               | 8.35                         |
|                | 3.65       | 14.74           | 5.72                  | 0.39                          | 13.44                  | 8.86                    | 93.76  | 16.39               | 10.58                        |
| 3.73           | 19.00      | 6.84            | 0.36                  | 14.28                         | 9.97                   | 111.13                  | 16.25  | 11.15               |                              |
| <b>Min</b>     | 2.78       | 14.74           | 4.44                  | 0.28                          | 11.76                  | 7.86                    | 56.23  | 8.86                | 6.08                         |
| <b>Max</b>     | 3.65       | 29.84           | 11.72                 | 0.49                          | 16.38                  | 14.89                   | 130.71 | 16.82               | 11.97                        |
| <b>Average</b> | 3.13       | 19.28           | 7.49                  | 0.39                          | 14.14                  | 10.91                   | 97.63  | 13.30               | 9.04                         |
| <b>SD</b>      | 0.41       | 4.05            | 1.95                  | 0.05                          | 1.31                   | 2.15                    | 23.13  | 2.41                | 1.82                         |
| <b>P value</b> | 0.2913     | 0.2318          | 0.0206                | 0.0225                        | 1.0000                 | 0.0016                  | 0.0000 | 0.0034              | 0.0031                       |

**Table S5**

| <b>Dog name</b> | <b>% of Length stretch</b> | <b>Stretch rate</b> |
|-----------------|----------------------------|---------------------|
| <b>Normal</b>   | 5.00                       | 7.98                |
|                 | 5.00                       | 7.35                |
|                 | 5.00                       | 5.67                |
|                 | 5.00                       | 6.93                |
|                 | 5.00                       | 7.35                |
|                 | 5.00                       | 7.35                |
|                 | 5.00                       | 6.09                |
|                 | 5.00                       | 5.88                |
|                 | 5.00                       | 7.56                |
|                 | 5.00                       | 7.56                |
|                 | 5.00                       | 6.51                |
|                 | 5.00                       | 7.56                |
|                 | 5.00                       | 7.56                |
|                 | 5.00                       | 8.19                |
| 5.00            | 6.51                       |                     |

|                |      |      |
|----------------|------|------|
| <b>Min</b>     | 5.00 | 5.67 |
| <b>Max</b>     | 5.00 | 8.19 |
| <b>Average</b> | 5.00 | 7.07 |
| <b>SD</b>      | 0.00 | 0.77 |

|                 |      |      |
|-----------------|------|------|
| <b>Affected</b> | 5.00 | 6.93 |
|                 | 5.00 | 6.51 |
|                 | 5.00 | 7.14 |
|                 | 5.00 | 7.98 |
|                 | 5.00 | 5.88 |
|                 | 5.00 | 6.72 |
|                 | 5.00 | 7.56 |
|                 | 5.00 | 6.72 |
|                 | 5.00 | 7.35 |
|                 | 5.00 | 7.98 |
|                 | 5.00 | 6.93 |
|                 | 5.00 | 6.30 |
|                 | 5.00 | 8.19 |
|                 | 5.00 | 6.72 |
| 5.00            | 7.14 |      |

|                |      |      |
|----------------|------|------|
| <b>Min</b>     | 5.00 | 5.88 |
| <b>Max</b>     | 5.00 | 8.19 |
| <b>Average</b> | 5.00 | 7.07 |
| <b>SD</b>      | 0.00 | 0.65 |

**P value** 1.00
